1 **An unconventional GABAergic circuit differently controls pyramidal**  
2 **neuron activity in two visual cortical areas via endocannabinoids**

3 Martin Montmerle<sup>1\*</sup>, Fani Koukoulis<sup>1\*</sup>, Andrea Aguirre<sup>1</sup>, Jérémy Peixoto<sup>1</sup>, Vikash Choudhary<sup>1</sup>, Marcel  
4 De Brito Van Velze<sup>1</sup>, Marjorie Varilh<sup>2</sup>, Francisca Julio-Kalajzic<sup>2</sup>, Camille Allene<sup>1</sup>, Pablo Mendéz<sup>3</sup>,  
5 Giovanni Marsicano<sup>2</sup>, Oliver M. Schlüter<sup>4,5</sup>, Nelson Rebola<sup>1</sup>, Alberto Bacci<sup>1#</sup> and Joana Lourenço<sup>1,6#</sup>

6  
7 <sup>1</sup>ICM - Institut du Cerveau; Sorbonne Université; INSERM, CNRS, Paris, France

8 <sup>2</sup>INSERM, U1215 NeuroCentre Magendie; University of Bordeaux, Bordeaux 33077, France

9 <sup>3</sup>Instituto Cajal (CSIC), Madrid, Spain

10 <sup>4</sup>Department of Psychiatry and Psychotherapy, University Medical Center Göttingen, Göttingen,  
11 Germany

12 <sup>5</sup>Department of Neuroscience, University of Pittsburgh, Pittsburgh, PA, USA

13 <sup>6</sup>Lead contact

14

15

16 \*These authors equally contributed to this paper

17

18 #Co-senior, corresponding authors:

19 [alberto.bacci@icm-institute.org](mailto:alberto.bacci@icm-institute.org)

20 [joana.lourenco@icm-institute.org](mailto:joana.lourenco@icm-institute.org)

21

22

## 23 **Summary**

24           Perisomatic inhibition of neocortical pyramidal neurons (PNs) coordinates cortical network  
25 activity during sensory processing, and it has been mainly attributed to parvalbumin-expressing basket  
26 cells (BCs). However, cannabinoid receptor type 1 (CB1)-expressing interneurons also inhibit the  
27 perisomatic region of PNs but the connectivity and function of these elusive – yet prominent –  
28 neocortical GABAergic cells is unknown. We found that the connectivity pattern of CB1-positive BCs  
29 strongly differs between primary and high-order cortical visual areas. Moreover, persistently active  
30 CB1 signaling suppresses GABA release from CB1 BCs in the medial secondary visual cortex (V2M), but  
31 not in the primary (V1) visual area. Accordingly, *in vivo*, tonic CB1 signaling is responsible for higher  
32 but less coordinated PN activity in V2M than in V1. Our results indicate a differential CB1-mediated  
33 mechanism controlling PN activity, and suggest an alternative connectivity schemes of a specific  
34 GABAergic circuit in different cortical areas

## 36 **Introduction**

37           The integration of sensory information into a coherent representation of the external world is  
38 accomplished by cortical circuits formed by a multitude of cellular subtypes that connect with each  
39 other following a detailed blueprint (Pfeffer et al., 2013;Kepecs and Fishell, 2014;Allene et al.,  
40 2015;Tremblay et al., 2016). Importantly, fast synaptic GABAergic inhibition is crucial in shaping both  
41 spontaneous and sensory-evoked cortical activity (Isaacson and Scanziani, 2011). Inhibitory GABAergic  
42 neurons (interneurons) are highly heterogeneous, and this remarkably rich diversity of cell types is  
43 epitomized by the specific pattern of synaptic connections that each interneuron subtype forms with  
44 excitatory principal neurons (PNs) (Ascoli et al., 2008;Tremblay et al., 2016;Lourenco et al., 2020b).  
45 The result is an efficient orchestration of cortical activity (Isaacson and Scanziani, 2011) *via* a highly  
46 specialized division of labor of different interneuron types (Freund and Katona, 2007). In particular,  
47 perisomatic-targeting basket cells (BCs) form inhibitory synapses mainly near the cell soma of PNs,

48 and thus control spike generation and timing (Buzsaki and Wang, 2012). A prominent perisomatic-  
49 targeting interneuron type, the parvalbumin (PV)-expressing BC, is important during sensory  
50 information processing (Atallah et al., 2012; Lee et al., 2012; Wilson et al., 2012). Moreover, due to  
51 their fast biophysical kinetics and reliability, PV BCs drive cognitive-relevant network oscillations in the  
52  $\gamma$ -frequency range (30-100 Hz) (Freund and Katona, 2007; Buzsaki and Wang, 2012; Deleuze et al.,  
53 2019). PV BCs have been extensively studied because they are abundant, easily identifiable by their  
54 typical fast-spiking pattern, and they can be genetically tagged and manipulated in different brain  
55 regions (Taniguchi et al., 2011). Yet, PV BCs are not the only inhibitory cell type controlling the  
56 perisomatic region of neocortical PNs (Freund and Katona, 2007). Most notably, interneurons  
57 expressing high levels of cannabinoid receptor type 1 (CB1) also form inhibitory synapses with PN cell  
58 bodies (Bodor et al., 2005). These cells have been traditionally identified as expressing cholecystokinin  
59 (CCK), especially in the hippocampus (Marsicano and Lutz, 1999; Katona et al., 1999; Hefft and Jonas,  
60 2005; Daw et al., 2009; Dudok et al., 2021), and they form GABAergic synapses that are much less  
61 reliable (Wilson et al., 2001; Hefft and Jonas, 2005; Daw et al., 2009). However, the properties and roles  
62 of CB1 BCs within neocortical circuits remain elusive. In particular, whether CB1 BCs operate an  
63 efficient control of neocortical PN firing is unknown.

64 Endogenous cannabinoids (endocannabinoids, eCBs) acting on CB1 are known to modulate  
65 strongly synaptic transmission (Hajos et al., 2000; Maejima et al., 2001; Wilson and Nicoll, 2001; Kano  
66 et al., 2009; Castillo et al., 2012). In particular, CB1 receptors potently inhibit release of GABA, resulting  
67 in several forms of inhibitory plasticity, such as depolarization-induced suppression of inhibition (DSI)  
68 and long-term depression of inhibitory synapses (LTDi) (Marsicano et al., 2002; Younts and Castillo,  
69 2014). Both plastic phenomena rely on retrograde signaling of eCBs, which are synthesized on demand  
70 in the postsynaptic pyramidal neurons (PNs) by intracellular  $\text{Ca}^{2+}$  increase or mGluR activation, and  
71 delivered to presynaptic terminals of CB1-expressing GABAergic interneurons (Kano et al.,  
72 2009; Castillo et al., 2012). In addition to this on-demand eCB modulation of neurotransmitter release,  
73 in the hippocampus, CB1 receptors were reported to be persistently active thus leading to constant

74 signaling and tonic inhibition of GABA release from CB1 interneurons (Losonczy et al., 2004;Neu et al.,  
75 2007;Lee et al., 2010).

76 Sensory systems are highly organized and hierarchal. Sensory information is relayed (via the  
77 thalamus) to the primary sensory neocortical areas, mainly in layer (L) 4, and it is then passed along  
78 to other cortical layers in a stereotyped sequence before being sent to higher-order associative  
79 cortical areas. In parallel, higher-order cortical areas send information to primary cortices, modulating  
80 their activity (Larkum, 2013). These loops allow information to travel across different sensory areas  
81 via both direct connections and cortico-thalamic pathways (Larkum, 2013;Harris and Shepherd,  
82 2015;Glickfeld and Olsen, 2017). Higher-order sensory cortices are integrative areas receiving both  
83 bottom-up (or sensory) as well as top-down (or contextual) information, thus playing a major role in  
84 decoding specific sensory features and in predictive processing and behavior (Glickfeld and Olsen,  
85 2017;Clancy et al., 2019;Keller et al., 2020;Murgas et al., 2020;Jin and Glickfeld, 2020). Cognitive  
86 activity is strongly influenced by the functional state of cortical circuits, which have been hypothesized  
87 to be uniform across different cortical areas and characterized by specific functions (Kepecs and  
88 Fishell, 2014). Nevertheless, recent evidence indicates that the canonical cortical circuit for  
89 perisomatic inhibition exhibits peculiarities in different cortical areas (Whissell et al., 2015;Pluta et al.,  
90 2019;Naka et al., 2019;Lourenco et al., 2020b).

91 Using a mouse line specifically tagging CB1-expressing neurons (CB1-tdTomato mice) (Winters et  
92 al., 2012), here we set out to study the morpho-functional features of neocortical CB1 BCs and test  
93 whether these cells operate an efficient control of PN activity in the visual cortex.

94 In contrast to generally thought homogenous interneuron motifs, we found that CB1 expression is  
95 generally stronger in associative than in primary sensory cortical areas. We then focused on primary  
96 visual cortex (V1) and its associative, higher-order medial secondary area (V2M), which exhibits strong  
97 CB1 expression. We describe a differential morphological and functional connectivity scheme of CB1  
98 interneurons in V1 and V2M. Tonic CB1 modulation conferred specific weak presynaptic properties  
99 at inhibitory synapses from CB1 BCs only in L2/3 of V2M. This area-specific connectivity and eCB

100 modulation of GABA release from CB1 BCs was responsible for lower PN activity in V1 compared to  
101 V2M *in vivo*. Moreover, visual area-specific tonic CB1 signaling differently set the amount of correlated  
102 activity of PNs in the two visual areas. Therefore, tonic CB1 signaling is responsible for a dynamic  
103 modulation of GABA release, which is specific for higher order visual areas.

104

## 105 **Results**

### 106 **Differential CB1 expression and morphological properties of CB1-positive interneurons in primary** 107 **and higher-order visual cortex**

108 CB1 is known to modulate neurotransmitter release in virtually all brain areas (Castillo et al., 2012). In  
109 particular, CB1-dependent modulation of GABA release has been well characterized in hippocampal  
110 interneurons, but whether neocortical CB1-expressing interneurons possess similar properties is  
111 unclear. Moreover, differences in CB1 expression between primary and higher-order areas have been  
112 reported (Yoneda et al., 2013) and could account for functional diversity of GABAergic circuits across  
113 different cortical areas. However, the exact CB1 expression pattern across layers in V1 and V2M has  
114 not yet been examined. We therefore sought to describe this pattern in more detail using CB1  
115 immunofluorescence in wild-type mice (Figure 1A). CB1 immunostaining revealed a classical pattern  
116 of fibrous processes, which is consistent with its main axonal expression. Overall, CB1 expression was  
117 highest in L1 of V1 and in L2/3 of V2M (Figure 1A and 1B). To compare the laminar expression between  
118 the two areas, we binned this data into distances corresponding to cortical layers (Figure 1C). In V1,  
119 the average intensity of peak-normalized fluorescence gradually decreased from L1 to L4 (respectively  
120  $70.5 \pm 2.2$  % and  $38.7 \pm 2.3$  %,  $n=11$  animals, 3 slices per animal), to then increase and reach another  
121 peak in L6 ( $66.3 \pm 3.2$  %; Figure 1A, black and 1B, black bars). In contrast, in V2M the peak-normalized  
122 fluorescence from pia to white matter was always comprised between a maximum in L2/3 and a  
123 minimum in L5 (respectively  $70.7 \pm 3.3$  % and  $57.3 \pm 3.3$  %; Figure 1A, red line and 1B, red bars). We  
124 found that, except L6 and L1, the level of expression of CB1 was higher in all other cortical layers of  
125 V2M than V1 (Friedman, repeated-measures, post hoc analysis with correction for multiple

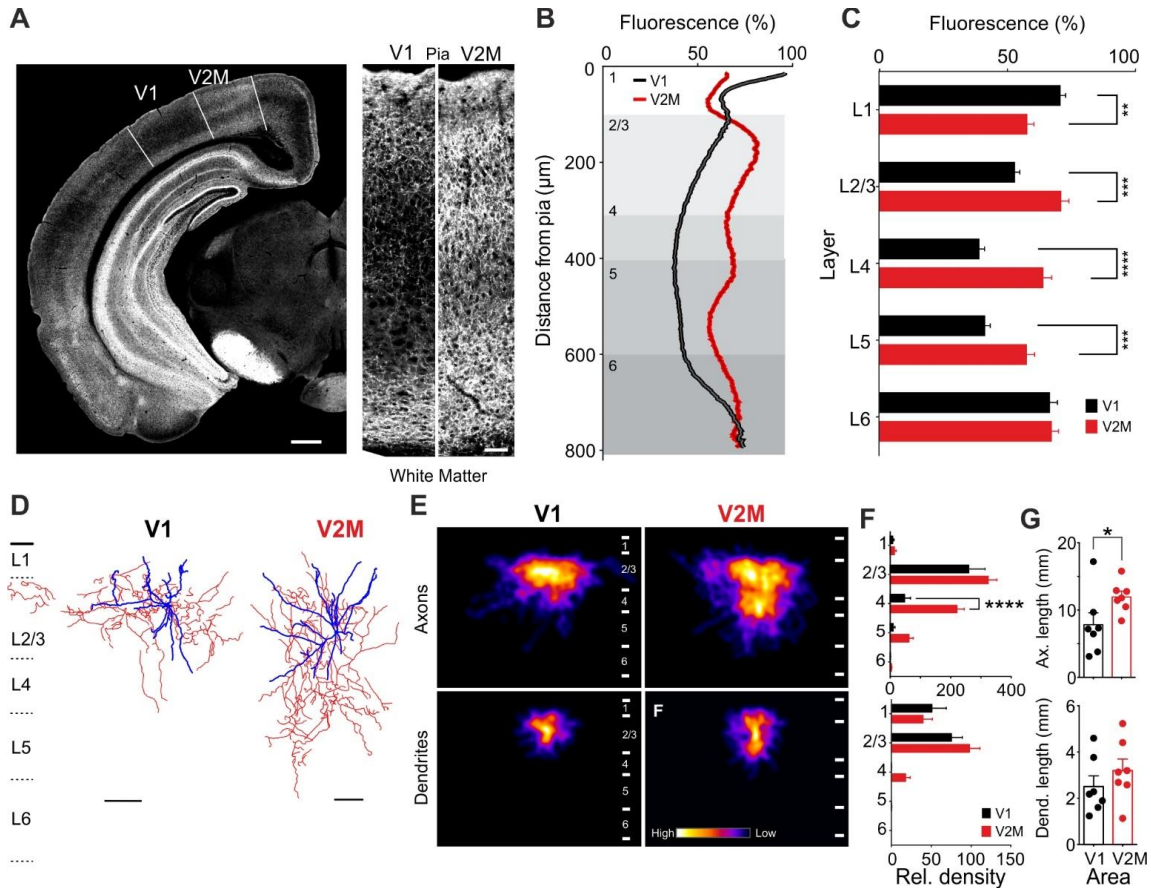

126 comparisons, Sidak's multiple comparisons test; Figure 1B,C). In particular, L2/3, 4 and 5 of V1 CB1  
 127 expression was weaker than in V2M ( $52.6 \pm 2.2$ ,  $38.77 \pm 2.3$ ,  $41 \pm 2.2\%$ , respectively;  $p = 0.0001$ ,  
 128  $p < 0.0001$ ,  $p = 0.0006$ , respectively).

129 CB1 is most prominently expressed on inhibitory axonal fibers (Marsicano and Lutz, 1999; Katona et  
 130 al., 1999). Hence, the difference in CB1 expression pattern between V1 and V2M shown in Figure 1  
 131 could be explained by: *i*) different numbers of CB1 BCs between the two areas, *ii*) distinct fiber density

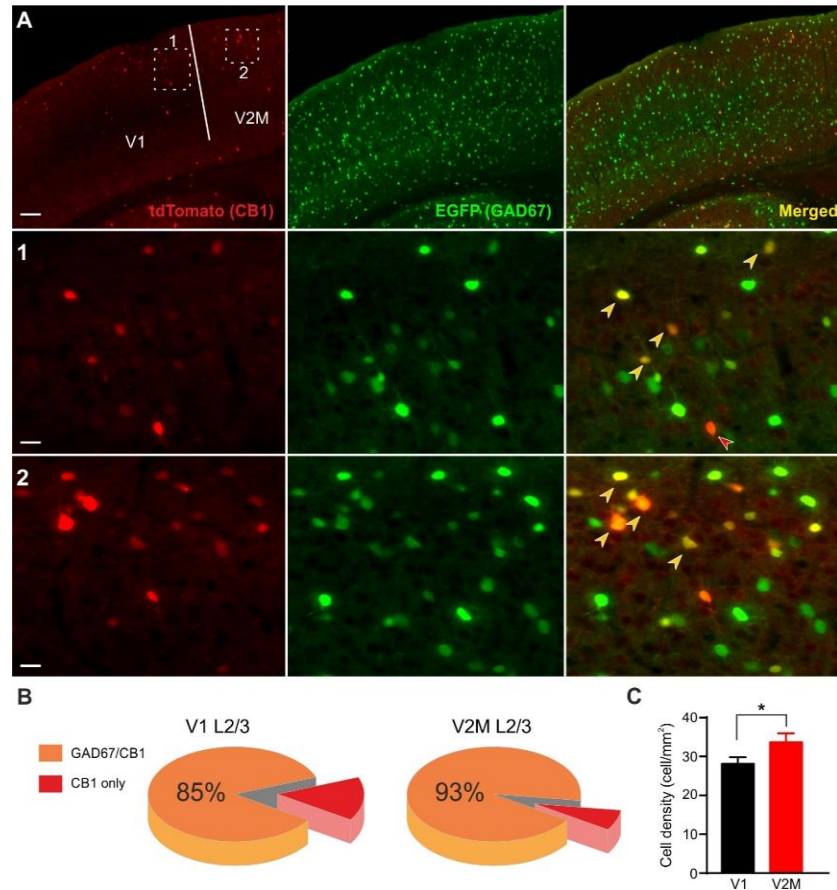

**Figure S1. Density of CB1-expressing interneurons in V1 and V2M.**

**A:** Top row: Micrograph illustrating tdTomato (red) and EGFP (green) immunoreactivity in V1 and V2M in a CB1-tdTomato::GAD67EGFP mouse. This line was used to quantify CB1-expressing interneurons in L2/3 of the two visual areas. White dashed boxes are illustrated at increased resolution in the two rows below. Orange arrows illustrate CB1-expressing interneurons and red arrows illustrate CB1-expressing principal (pyramidal?) neurons. Scale bar: 100 (top row) and 25  $\mu\text{m}$  (middle and bottom rows). **B:** Pie charts illustrating the fraction of CB1-expressing interneurons (co-localizing with EGFP) in the two visual areas. **C:** Cortical laminar density of CB1 INs in L2/3 of V1 and V2. Mean  $\pm$  SEM, n=3 slices/animal, N = 5 animals for each condition. \*: P < 0.05.

132 originating from the same interneurons, *iii*) different level of expression of CB1 in each given axon.

133 CB1 is not expressed exclusively by GABAergic interneurons (Marsicano and Lutz, 1999; Katona et al.,

134 2006; Marinelli et al., 2009). Therefore, we crossed CB1-tdTomato with GAD67-GFP mice, to quantify

135 CB1-expressing GABAergic cells in the two visual areas. We thus counted CB1-positive GABAergic

136 interneurons in each layer of the two areas (Figure S1). CB1-expressing interneurons were prominently

137 expressed in L2/3, comprising 31% and 35% of the total CB1-IN population in V1 and V2M, respectively

138 (Figure S1A). In particular, we found that the large majority of CB1 cells co-expressed GAD67 (Figure

139 S1A; orange arrows; 85% and 93% co-localization in L2/3 V1 and V2M, respectively). We found that in

140 L2/3 of V2M, CB1 interneurons were significantly more numerous than in V1 (Friedman, repeated-

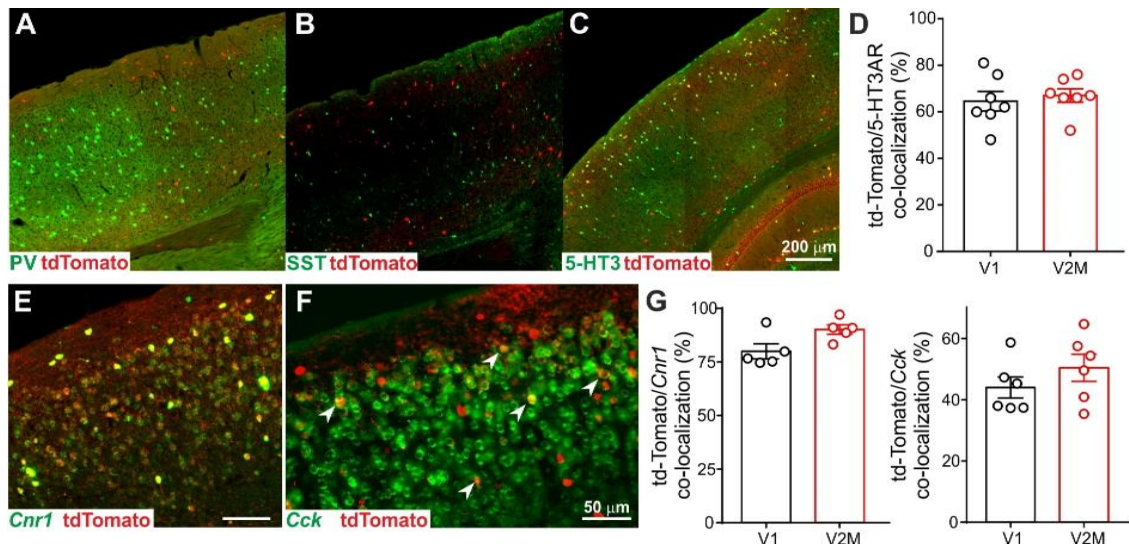

**Figure S2. Lack of expression of PV and SST markers in CB1 BCs of the mouse visual cortex**

**A:** Micrograph illustrating DsRed (red) and GFP (green) immunoreactivity against tdTomato and parvalbumin, respectively, in V1 and V2M. Note the lack of co-localization of parvalbumin marker with tdTomato CB1 BCs.

**B:** Micrograph illustrating DsRed (red) and GFP (green) immunoreactivity against tdTomato and somatostatin, respectively, in V1 and V2M. Note the lack of co-localization of somatostatin marker with tdTomato CB1 BCs.

**C:** Micrograph illustrating DsRed (red) and GFP (green) immunoreactivity in a 5-HT3-Cre::RCE mouse crossed with a CB1-tdTomato mouse. Therefore, GFP expression labels 5-HT3-expressing interneurons. Note extensive co-localization between the two markers.

**D:** Summary plot of CB1/5-HT3AR co-localization in V1 and V2M.

**E:** Representative micrograph illustrating fluorescent *in situ* hybridization (FISH) against *Cnr1* (CB1) mRNA (green) and immunohistochemistry for DsRed in a CB1-tdTomato mouse to label td-Tomato-expressing neurons.

**F:** Same as in E, but FISH was performed using anti-*Cck* probes.

**G:** Summary graphs illustrating co-localization of *Cnr1* (CB1, left) and *Cck* (right) mRNA and td-Tomato. Please note the massive co-localization of CB1 mRNA with td-Tomato, validating the mouse line. Note also the extensive co-localization with CCK. For PV, n=3 slices/animal, N = 3 animals; for SST, = 4 slices/animals, N = 3 animals. For *Cnr1* n=4 slices/animal, N = 5 animals, for *Cck* n=6 slices/animal, N = 6 animals

141 measures, post hoc analysis with correction for multiple comparisons, Sidak's multiple comparisons  
 142 test  $p < 0.05$ ; Figure S1C). Importantly, CB1 cells did not co-localize with parvalbumin (PV)- nor  
 143 somatostatin (SST)-positive cells (Figure S2A,B), indicating that CB1 BCs do not belong to these two  
 144 prominent cortical interneuron subclasses originating from the medial ganglionic eminence (MGE).  
 145 However, the majority (~60%) of CB1 cells co-localized with 5HT<sub>3A</sub>R (Figure S2 C,D). In situ hybridization  
 146 using *CB1* (*Cnr1*) and *CCK* (*Cck*) mRNA probes revealed co-localization of td-Tomato expressing neurons  
 147 with *CB1* (>75%) and *CCK* (>40%; Figure S2 G). Overall, these results indicate that the CB1-tdTomato  
 148 accurately labels CB1 neurons, which are part of interneurons originating from the caudal ganglionic  
 149 eminence (CGE) (Tremblay et al., 2016; Paul et al., 2017).

150 To test whether increased CB1 staining in deeper cortical layers in V2M was also due to differential  
 151 axonal projections, we performed whole-cell, patch-clamp recordings from L2/3 multipolar CB1 BCs,



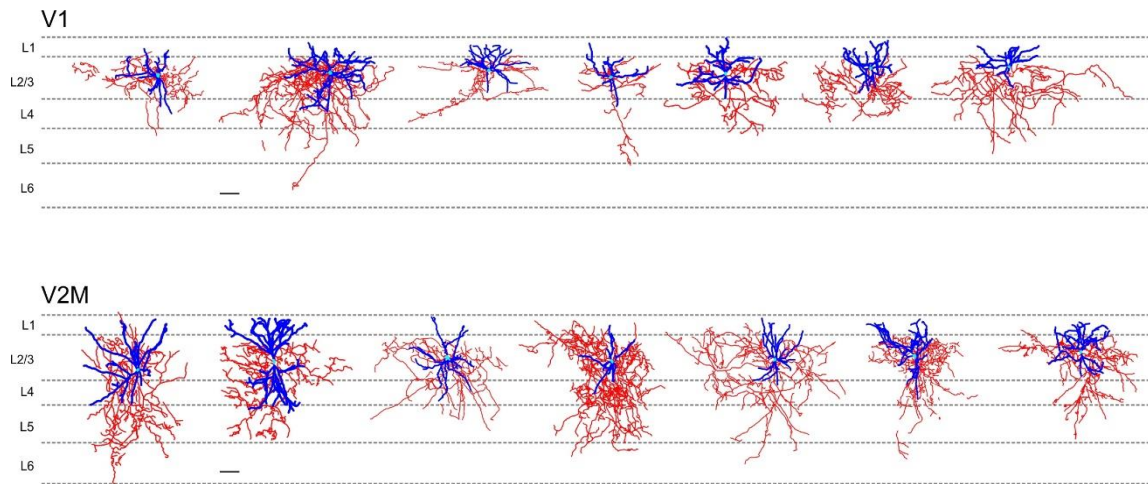

**Figure S3. L4 of V2M is highly innervated by L2/3 CB1 BCs axons.**

**A:** Individual reconstructions of CB1 BCs in V1 filled with biocytin (5-8 mg/mL). Dendrites are in blue, axons in red, and soma in turquoise. **B:** Same as in A but for CB1 BCs in V2. Scale bars = 100  $\mu$ m.

152 visually identified as expressing bright fluorescence in CB1-tdTomato mice. We included high  
153 concentrations of biocytin (5-8 mg/mL) in whole-cell pipettes to reveal axonal arborizations (Jiang et  
154 al., 2015). Untypical for local soma innervating interneurons, anatomically reconstructed CB1 BCs  
155 revealed a strong axonal innervation in deep cortical L4 selectively in V2M, whereas the same type of  
156 neurons in V1 more typically projected mainly within L2/3 (Figure 1 D-F and Figure S3; relative axonal  
157 density:  $220 \pm 25$  and  $62 \pm 15$  vs.  $47 \pm 20$  and  $10 \pm 6$ , V2M vs. V1, respectively;  $p < 0.001$ ;  $n = 7$  for both  
158 V1 and V2M). Accordingly, CB1 BCs in V2M exhibited a larger total axonal length than in V1 ( $p = 0.0379$ ;  
159 Mann–Whitney U test), with no differences in dendritic length in both visual areas ( $p = 0.32$ ; Mann–  
160 Whitney U test; Figure 1G).

161 Differences in axonal projection patterns between CB1 BCs in V1 and V2M could imply that they  
162 belong to different functional interneuron subtypes. We therefore tested a battery of  
163 electrophysiological parameters, and found no difference in single action potential waveform and  
164 firing dynamics (Figure S4).

165 Altogether, these results indicate a contrasting pattern of CB1 expression in V1 and V2M. This is due  
166 to a more prominent descending axonal innervation selectively in V2M, suggesting a differential  
167 connectivity scheme from this IN subtype in the two visual areas.

168

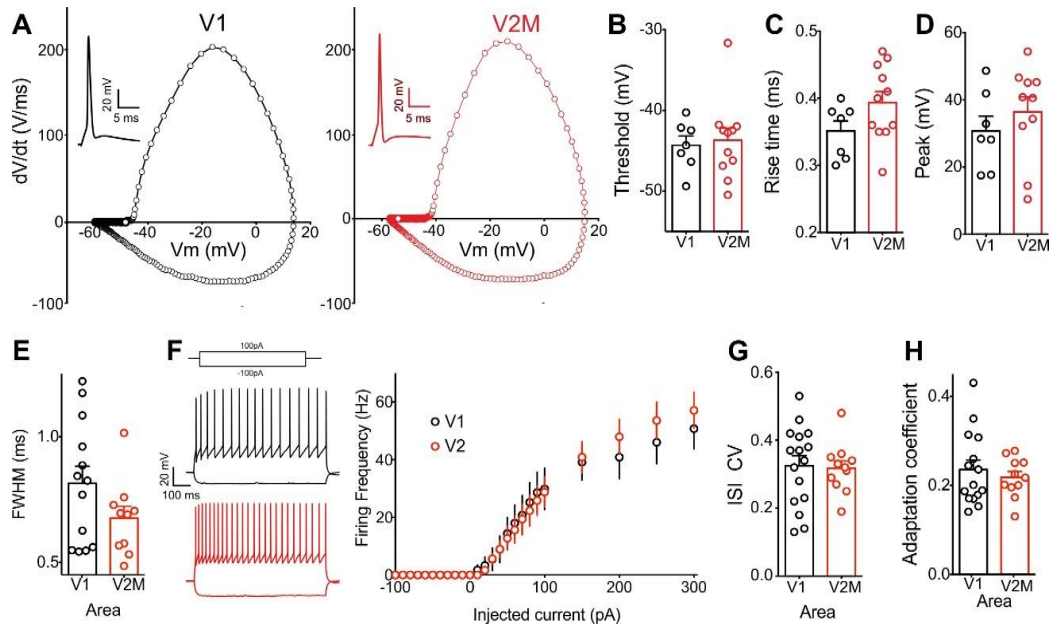

**Figure S4. L2/3 CB1 INs exhibit similar active and passive single-cell properties in V1 and V2.**

**A:** Phase plane plots of the derivative of a single AP (insert) evoked by minimal current injection step (1.5 ms) in V1 (black) and V2 (red). **B-E:** Action potential parameters analyzed for characterization of the two CB1 BCs populations. **F:** Injection of negative and positive current in V1 (black trace) and V2 (red trace), with the resulting frequency/injected current curve (right). **G:** Coefficient of variation of the inter-spike interval of spikes elicited by depolarizing pulses. **H:** Adaptation coefficient corresponding to the ratio of the interval between the two first and two last spikes elicited by a depolarizing pulse.

## 169 **Functional differences of intra- and infra-layer connectivity of CB1 BCs in V1 and V2M**

170 The morphological differences between L2/3 CB1 BCs in V1 and V2M described above prompted the  
 171 question whether the probability of CB1 cells to connect to postsynaptic targets within and across  
 172 layers is different in V1 and V2M.

173 We performed dual simultaneous whole-cell paired recordings between presynaptic CB1 BCs in L2/3  
 174 and postsynaptic PNs in either L2/3 or L4, in V1 and V2M (Figure 2A,B). In both areas, we reliably  
 175 obtained connected pairs when the post-synaptic PN was also located in L2/3 (Figure 2A; connected  
 176 pairs: 56 out of 218 vs. 53 out of 169 in V1 vs. V2M). However, when the postsynaptic cell was located  
 177 in L4, the likelihood of obtaining connected pairs was very low in V1 while remaining high in V2M (5  
 178 out of 75 and 46 out of 187, respectively; Figure 2A). These connectivity rates are largely consistent  
 179 with the axonal morphologies of these cells (Figure 1D-G). We found that the amplitudes of unitary  
 180 IPSCs (uIPSCs) were  $\sim 5.5$  fold larger onto PNs in L2/3 of V1 than V2M (uIPSC amplitude :  $183.4 \pm 39.93$   
 181 pA vs.  $33.38 \pm 5.539$  pA, L2/3 V1 vs. L2/3 V2M,  $n = 44$  and  $40$ , respectively,  $p < 0.0001$ ; *Kruskal-Wallis*

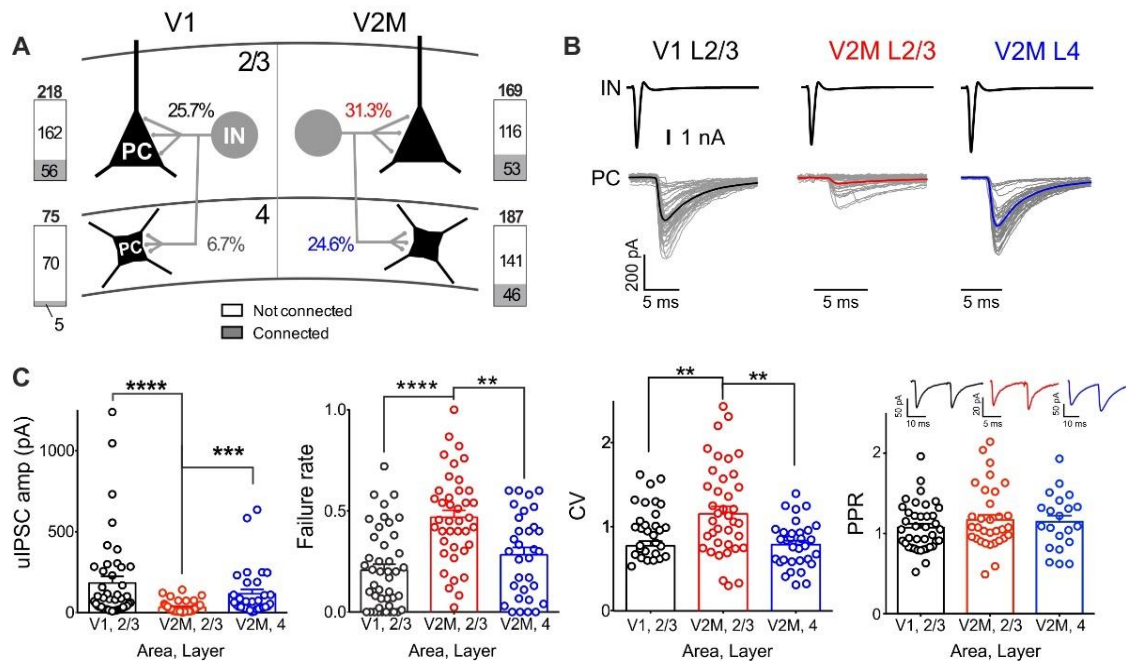

**Figure 2. Functional differences of intra- and infra-layer connectivity of CB1 BCs in V1 and V2M**

**A:** Connectivity rates of CB1 BC  $\rightarrow$  PN connectivity within L2/3 and to L4 in both V1 and V2M. **B:** Representative voltage-clamp traces of evoked uIPSCs in the postsynaptic PN (presynaptic action current above, in black) in monosynaptically connected pairs in V1 L2/3 (avg. in black), V2M L2/3 (avg. in red) and V2M L4 (avg. in blue) principal neurons. Individual (30) sweeps in light grey. **C:** Population data of uIPSC amplitude, failure rate, coefficient of variation (CV) and paired-pulse ratio (PPR). Black circles: V1 L2/3 connections; red circles: V2 L2/3 connections; blue circles: V2 L4 connections. All bar graphs represent mean  $\pm$  SEM; \* $p < 0.05$ , \*\*\*\* $p < 0.0001$ .

182 ANOVA followed by Dunn's multiple comparisons test; Figure 2B and C). Accordingly, failure rate and  
 183 variability (measured as coefficient of variation, or CV) of uIPSCs was much lower in CB1 IN-PN  
 184 connections in L2/3 of V1 than V2M ( $p < 0.0001$  and  $p = 0.0028$ , respectively; Kurskal-Wallis ANOVA  
 185 followed by Dunn's multiple comparisons test; Figure 2C). When limiting the analysis to successes  
 186 only, we did not observe any differences in the paired pulse ratio (PPR;  $p = 0.5$ , Kurskal-Wallis ANOVA;  
 187 Figure 2C). Connected pairs between CB1 BCs and postsynaptic PNs located in L4 of V2M were  
 188 stronger and more reliable than connections formed in L2/3 by the same interneurons (L4 uIPSCs  
 189 amplitude :  $116.4 \pm 26.55$  pA,  $n = 32$ ,  $p = 0.0013$ , Kurskal-Wallis ANOVA followed by Dunn's multiple  
 190 comparisons test, Figure 2C). Indeed these infra-laminar connections (from L2/3 to L4 in V2M) had  
 191 similar amplitudes, failure rate and CV as of CB1 IN-PN pairs in L2/3 of V1 ( $p > 0.05$ , Kurskal-Wallis  
 192 ANOVA for amplitude, failure rate and CV, Figure 2C). In sum, connections in L2/3 of V2M were the

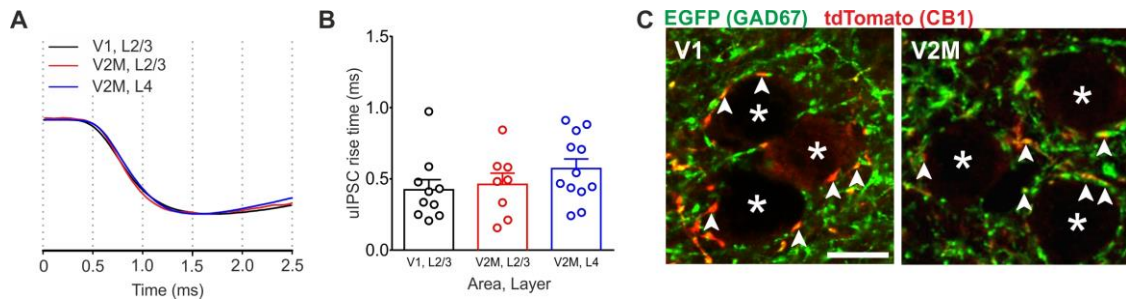

**Figure S5. L2/3 CB1 INs from V1 and V2 exhibit perisomatic properties**

**A:** Representative uIPSC traces illustrating fast rise time from L2/3 of V1 (black), L2/3 of V2M (red) and L4 of V2M (blue). **B:** Population data the three synaptic connections displaying fast (<1ms) rise times. **C:** Micrograph illustrating DsRed (red) and GFP (green) immunoreactivity against tdTomato and GAD67, respectively, in V1 and V2M. Note the perisomatic pattern of innervation, typical of basket cells. Scale bars = 10  $\mu$ m. Images were acquired with an inverted Confocal SP8 Leica DSL microscope.

193 weakest and most unreliable, when compared to the neighboring area or layer. When we examined  
194 uIPSC rise times, we found that they were fast (<1ms) and similar for all three synaptic connections  
195 (Figure S5A,B). This is consistent with a perisomatic pattern of innervation, typical of basket cells  
196 (Figure S5C).

197 Overall, these data indicate remarkably different functional projection patterns in the two visual  
198 cortical areas. Moreover, inputs from CB1 BCs in the visual cortex have area- and layer-specific  
199 properties. Given the marked difference in CV and failure rate, it is likely that inhibitory synapses from  
200 these interneurons possess visual-area, layer- and target-specific differences of presynaptic release of  
201 GABA.

202

### 203 **Activity-dependent modulation of synaptic efficacy from CB1 BCs is visual area- and layer-specific.**

204 Activation of presynaptic CB1 is often followed by strong short- and long-term forms of plasticity  
205 (Castillo et al., 2012). One of the most prominently studied form of short-term (seconds) of GABAergic  
206 plasticity is depolarization-induced suppression of inhibition (DSI). We therefore tested whether CB1-  
207 mediated DSI was different depending on the visual cortical areas where uIPSCs were recorded. DSI  
208 was evoked by 5-s long postsynaptic depolarizations at 0 mV. We found that CB1-dependent DSI was  
209 robustly present in all connected pairs, and it similarly affected uIPSCs in both V1 and V2M and in both  
210 cortical layers (Figure S6). CB1 signaling can be modulated by presynaptic activity (Lourenco et al.,  
211 2014). Importantly, presynaptic GABA release can be persistently modulated by tonic activation of

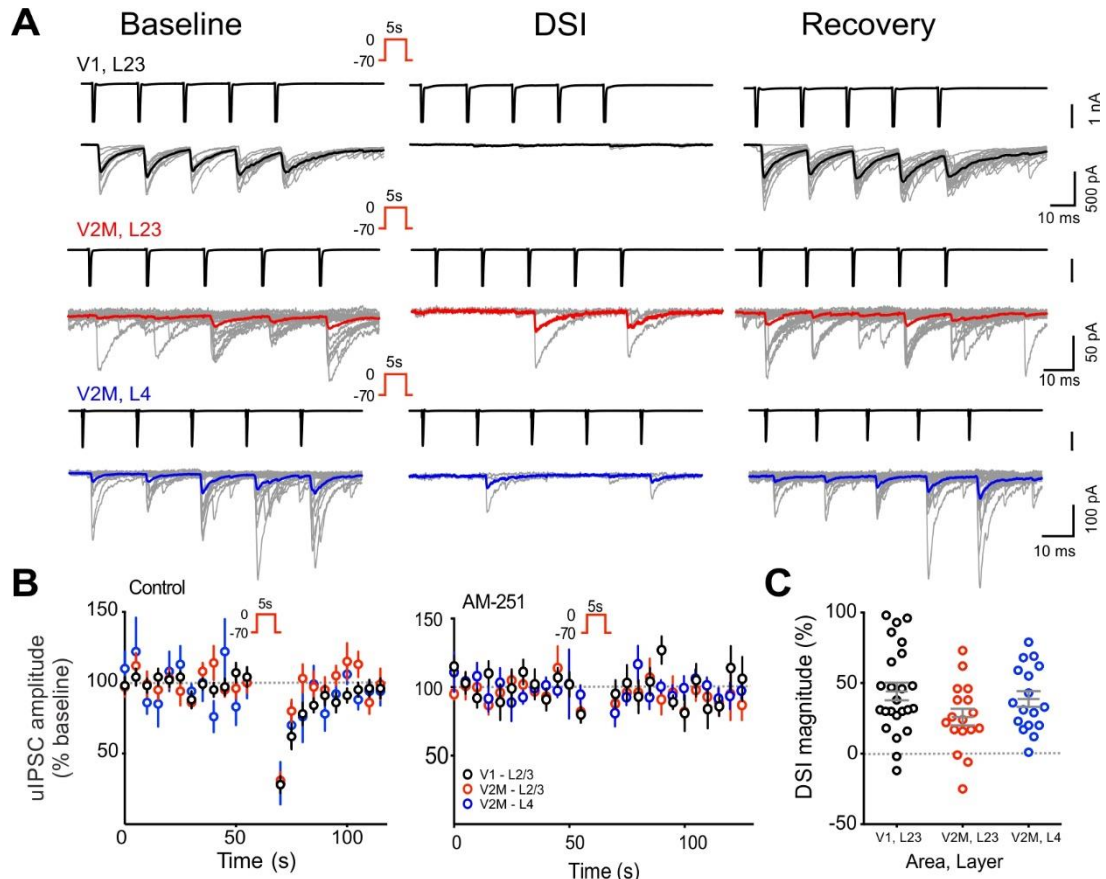

**Figure S6. CB1-dependent DSI was robustly present in all three synapses**

**A:** Representative traces in V1 L2/3 (top, black) V2 L2/3 (middle, red) and V2 L4 (bottom, blue) during the baseline (left), DSI (middle) and recovery from DSI (right). In all cases, presynaptic spikes above uIPSCs (black). Individual traces in grey and averages in the corresponding colour. Three sweeps were averaged for DSI and ten for baseline and recovery. Due to variability in uIPSC amplitude and high percentage of failures especially in V2M L4, the amplitude of postsynaptic responses to the presynaptic spike train was averaged in across the train (Vogel et al., 2016). **B:** Left panel, time course of average uIPSCs during baseline, DSI and recovery periods DSI in the three connections. The black dotted line represents the baseline value of 100 %. Right panel, time course of average uIPSCs during baseline, DSI and recovery periods DSI in presence of AM-251 for the three connections. **C:** Plot of individual average uIPSC amplitude after DSI. There is no differences in the maximum DSI values between connections in V1 L2/3, V2 L2/3 or V2 L4.

212 CB1 (Losonczy et al., 2004;Foldy et al., 2006;Neu et al., 2007), inducing chronic suppression of  
 213 inhibitory responses, which are unreliable and weak, similarly to those exhibited by CB1 BCs targeting  
 214 PNs in L2/3 of V2M. If this is the case, high frequency AP train invading the presynaptic terminal should  
 215 be able to override this CB1-mediated tonic modulation of inhibitory transmission (Losonczy et al.,  
 216 2004;Foldy et al., 2006;Neu et al., 2007). We therefore delivered four 50 Hz-trains to presynaptic CB1  
 217 BCs and found an up to two fold increase of synaptic efficacy (measured as total unitary postsynaptic  
 218 charge) during train applications only at connections in V2M between CB1 interneurons and L2/3 PNs  
 219 (mean synaptic charge:  $2.5 \pm 0.6$  nC vs.  $5.1 \pm 0.97$  nC train 1 vs. train 4;  $n = 16$ ;  $p < 0.001$ , Wilcoxon

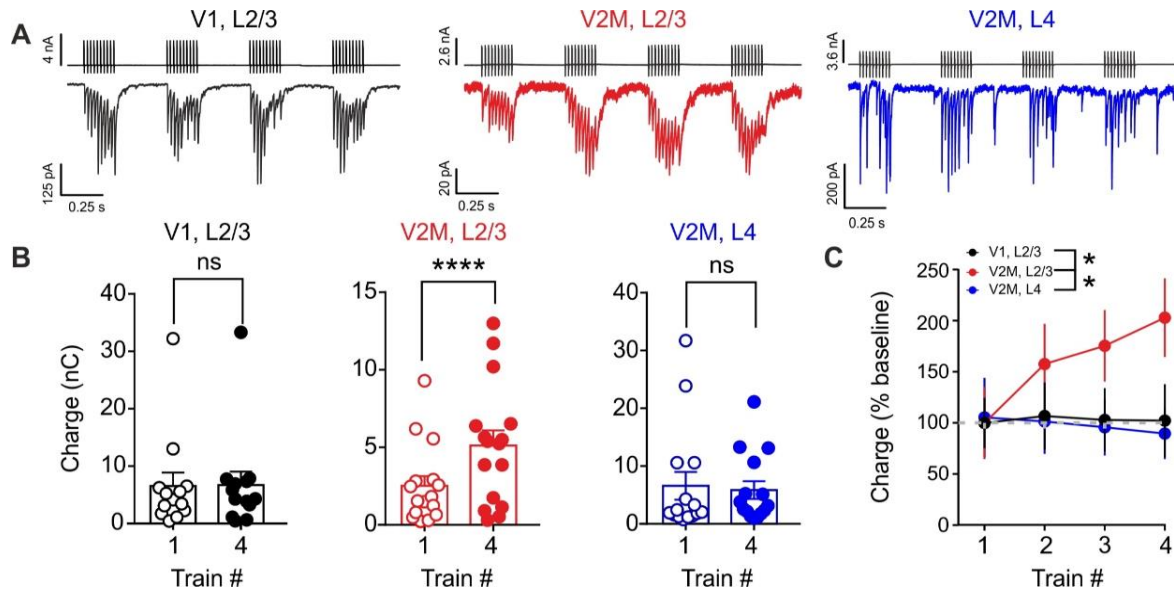

**Figure 3. Activity-dependent modulation of synaptic efficacy from CB1 BCs is visual area- and layer-specific.**

**A:** Representative traces illustrating uIPSCs recorded in PN, in response to four trains of presynaptic APs (10 spikes, 50 Hz) from CB1 BCs in V1, L2/3 (black), V2M, L2/3 (red) and V2M, L4 (blue). Shown are averaged traces of at least 10 individual trials. **B:** Population data of total postsynaptic charge calculated in the first and fourth train. **C:** Population data of percentage change of total postsynaptic charge at the three synapses in the two visual areas. Color code of B-C as in A.

220 matched-pairs signed rank test; Figure 3A-C ). In contrast, in pairs between CB1 BCs and PNs in V1,  
 221 L2/3 and V2M, L4 synaptic efficacy was similar across different presynaptic spike trains (mean synaptic  
 222 charge:  $6.6 \pm 2.3$  nC vs.  $6.7 \pm 2.3$  nC train 1 vs. train 4 for V1, L2/3 and  $6.6 \pm 2.4$  nC vs.  $5.9 \pm 1.5$  nC  
 223 train 1 vs. train 4 for V2M, L4;  $n = 13$  and  $n = 15$ , respectively;  $p > 0.05$ , Wilcoxon matched-pairs signed  
 224 rank test; Figure 3A-C).

225 These results indicate that GABAergic synapses contacting PNs in L2/3 of V2M were muffled selectively  
 226 and persistently, but could be temporarily awakened by increased presynaptic activity to a level similar  
 227 of the other studied connections.

228

229 **Visual area- and layer-specific GABAergic synaptic strength from CB1 BCs is due to selective tonic**  
 230 **endocannabinoid signaling.**

231 Results of Figure 3 indicate that the low synaptic efficacy is specific for L2/3 connections between CB1  
 232 BCs and PNs in V2M. This suggest that tonic CB1 signaling is specific for this layer and visual area. We  
 233 therefore, tested whether tonic signaling could play a role in explaining why the inhibitory synapses

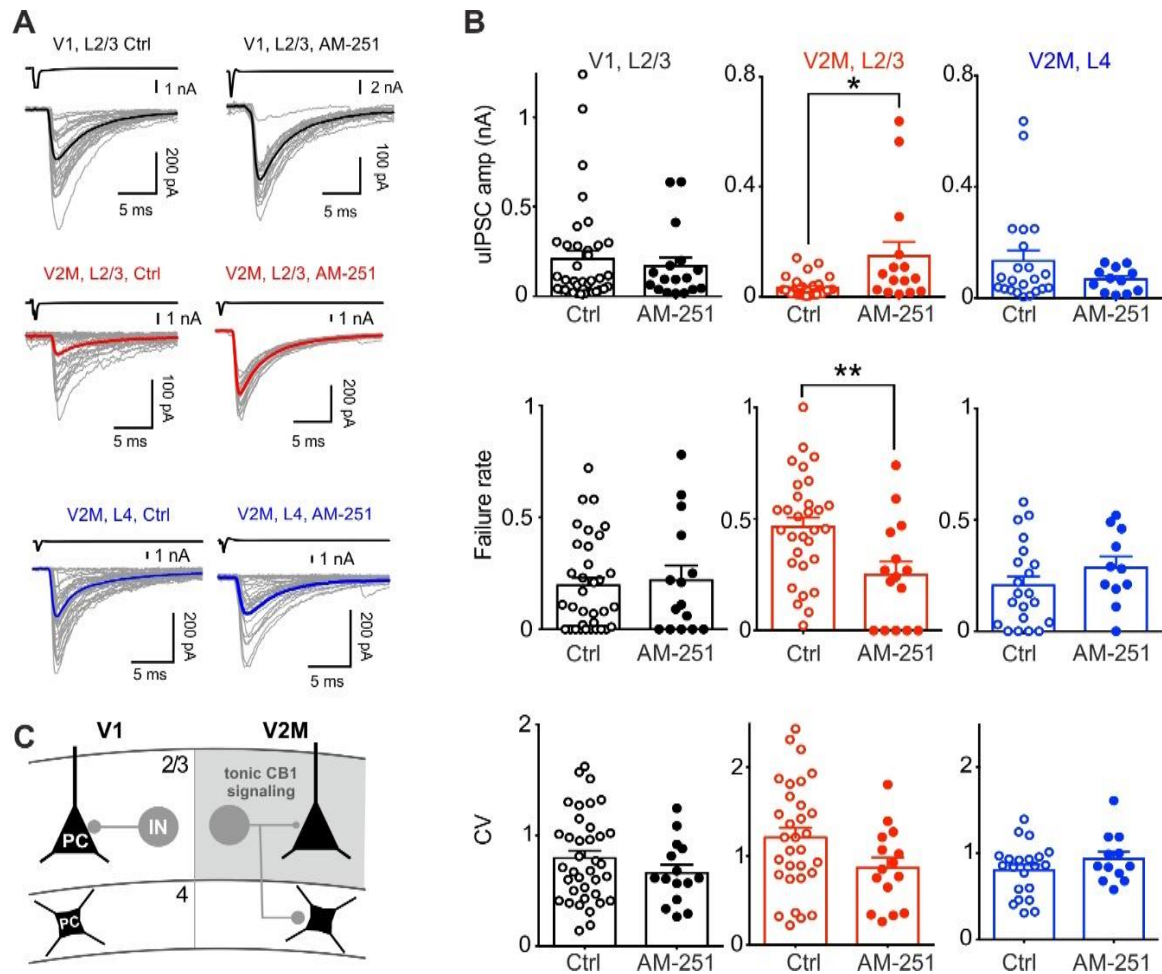

**Figure 4. Visual area- and layer-specific GABAergic synaptic strength from CB1 BCs is due to selective tonic endocannabinoid signaling.**

**A:** Representative uIPSC traces in the absence (Ctrl, left) and presence of 3  $\mu$ M AM-251 (right) in L2/3 of V1 (top, black), L2/3 of V2M (middle, red) and L4 of V2M (bottom, blue). Presynaptic spikes above uIPSCs in black. Grey traces are individual sweeps. **B:** Population data of uIPSC amplitude (top), failure rate and CV (bottom) recorded at the three synapses in control (open symbols) and in the presence of AM-251 (filled symbols). Color code as in A. **C:** Schematic summary of the main finding of this study. Grey area represents the specific expression of tonic CB1 signaling conferring weaker inhibition from CB1 BCs onto PN in L2/3 of V2M.

234 in L2/3 exhibit high failure rates and low amplitudes. We performed paired recordings in slices pre-  
 235 incubated with the CB1 antagonist AM-251 (3  $\mu$ M; Figure 4). In support of tonic CB1 signaling, the  
 236 uIPSC amplitude between connected pairs in V2M – L2/3 increased, when AM-251 was present in the  
 237 superfusate (uIPSC amplitude:  $33 \pm 6.3$ pA vs.  $148 \pm 51$ pA,  $n = 31$  vs.  $15$  control vs. AM-251;  $p = 0.0254$ ,  
 238 Kruskal-Wallis ANOVA followed by Dunn's multiple comparisons test, see below for comparisons with  
 239 other synapses, Figure 4B), and the failure rate decreased ( $0.46 \pm 0.04$  vs.  $0.25 \pm 0.06$ ,  $n = 31$  vs.  $15$   
 240 control vs. AM-251;  $p = 0.0059$ , Mann Whitney test). Conversely, inter-stimulus variability ( $1.2 \pm 0.1$   
 241 vs.  $0.87 \pm 0.1$ ,  $n = 31$  vs.  $15$  control vs. AM-251;  $p = 0.0737$ , Mann Whitney test) was not significantly

242 affected by AM-251 treatment. Overall, our data revealed that antagonizing CB1 converted weak and  
243 unreliable connections between CB1 BCs and PNs in L2/3 of V2M into strong and reliable synapses.  
244 Indeed, in the presence of AM-251, responses elicited in L2/3 of V2M were similar to those evoked in  
245 L2/3 of V1 and L4 of V2M (for both synapses  $p > 0.99$  test, Kurskal-Wallis ANOVA followed by Dunn's  
246 multiple comparisons test). In support of a selective effect in V2M L2/3, the drug had no effect on  
247 uIPSCs in V1, L2/3 and V2M, L4 (V1, L2/3 uIPSC amplitude:  $208 \pm 46$  pA vs.  $169 \pm 49$ pA,  $n = 37$  vs. 17  
248 control vs. AM-251; V2M, L4 uIPSC amplitude:  $133 \pm 37$  pA vs.  $67 \pm 13$ pA,  $n = 22$  vs. 12 control vs. AM-  
249 251;  $p > 0.099$  Kurskal-Wallis ANOVA followed by Dunn's multiple comparisons test)  
250 Altogether, these results indicate that tonic CB1 signaling is responsible for decreasing the strength of  
251 GABAergic synapses made by CB1-expressing interneurons selectively in L2/3 of the associative cortex  
252 V2M. Strikingly, this mechanism controls GABA release probability differentially at synapses from the  
253 same interneuron, whose axon originates in L2/3 but target different postsynaptic PNs in either L2/3  
254 or L4.

255

### 256 **Spontaneous activity of PNs is higher in V2M as compared to V1.**

257 Our previous results indicate that CB1 BCs operate a differential control of PN perisomatic region in  
258 V2M as compared to V1 through tonic CB1 signaling. Tonic inhibition of GABA release from CB1 BCs  
259 should in principle result in higher output activity of PNs. To test this hypothesis, we performed *in vivo*  
260 2-photon (2P)  $Ca^{2+}$  imaging in awake mice, free to locomote on a circular treadmill (Figure 5A). We  
261 measured spontaneous PN activity in L2/3 in either V1 or V2M in CB1 td-Tomato mice. We injected  
262 either V1 or V2M with an adeno-associated viral (AAV) vector expressing the genetically encoded  $Ca^{2+}$   
263 indicator GCaMP6f under the pan-neuronal promoter synapsin I (*SynI*). This allowed us to measure  
264  $Ca^{2+}$  transients as a proxy for neuronal firing from putative PNs and td-Tomato-expressing CB1 BCs  
265 (Figure 5B). We found that the overall mean change in fluorescence ( $\Delta F/F_0$ ) was much higher in V2M  
266 than in V1 (mean  $\Delta F/F_0 = 0.17 \pm 0.02$  vs.  $0.31 \pm 0.012$ , V1 vs. V2M, respectively;  $n = 7$  and 6 mice in V1  
267 and V2M, respectively;  $p = 0.0023$ ; Mann–Whitney U test, Figure 5C-D) suggesting differences in



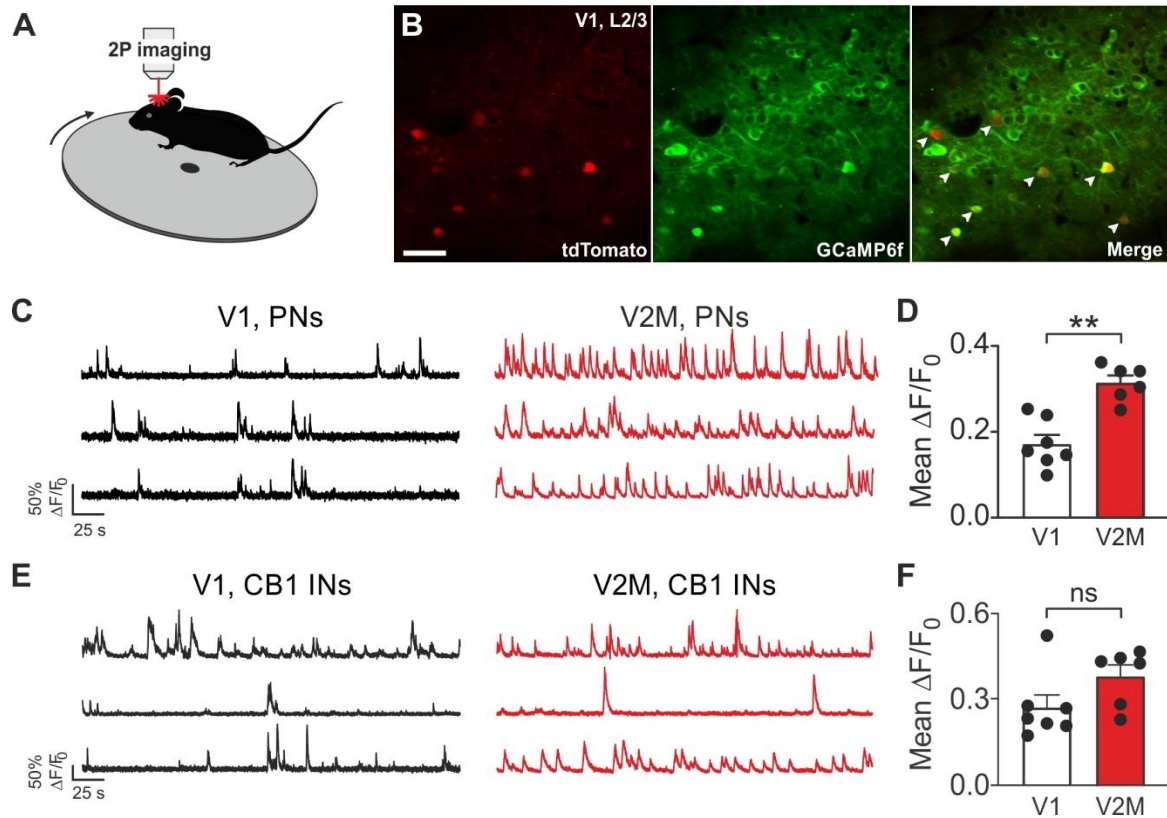

**Figure 5. Spontaneous activity of PNs is higher in V2M as compared to V1.**

**A:** Schematic of 2P imaging recordings in awake mice free to locomote on a rotating disk. **B:** Representative, average intensity projection images obtained in L2/3 of V1 from a CB1-tdTomato mouse. Red indicates tdTomato expression (left), green shows GCaMP6f expression (middle). The right panel illustrates the overlay of the red and green channels. Arrowheads point to CB1-expressing neurons. Scale bar: 50  $\mu$ m. **C:** Representative 2P  $\text{Ca}^{2+}$  fluorescence traces from three PNs in V1 (black, left) and in V2M (red, right). **D:** Population histogram of the mean  $\Delta F/F_0$  in V1 (white column) and V2M (red column). Each dot represents an individual mouse. **E-F:** Same as in C-D but on tdTomato expressing interneurons.

268 spontaneous activity of PNs across the two brain regions. We found no differences in mean movement  
 269 percentage ( $21.70 \pm 3.461\%$  vs  $23.75 \pm 0.9961\%$  in V1 and V2M, respectively;  $p = 0.2949$ ; Mann-  
 270 Whitney U test) and speed ( $0.4391 \pm 0.05976$  cm/s vs  $0.5161 \pm 0.09860$  cm/s in V1 and V2 M,  
 271 respectively;  $p = 0.6282$ ; Mann-Whitney U test) between the two animal groups. This indicates that  
 272 the differences in animal state are likely not the underlying cause of increased neuronal activity in  
 273 V2M. We then restricted our analysis on td-Tomato-expressing neurons, and we found that CB1 INs  
 274 did not exhibit statistically different activity in the two visual areas (mean  $\Delta F/F_0 = 0.27 \pm 0.04$  vs.  $0.38$   
 275  $\pm 0.04$ , V1 vs. V2M, respectively;  $n = 7$  and  $6$  mice in V1 and V2M, respectively;  $p = 0.10$ ; Mann-Whitney  
 276 U test, Figure 5E-F). This suggests that increased activity in V2M was overall restricted to PNs.

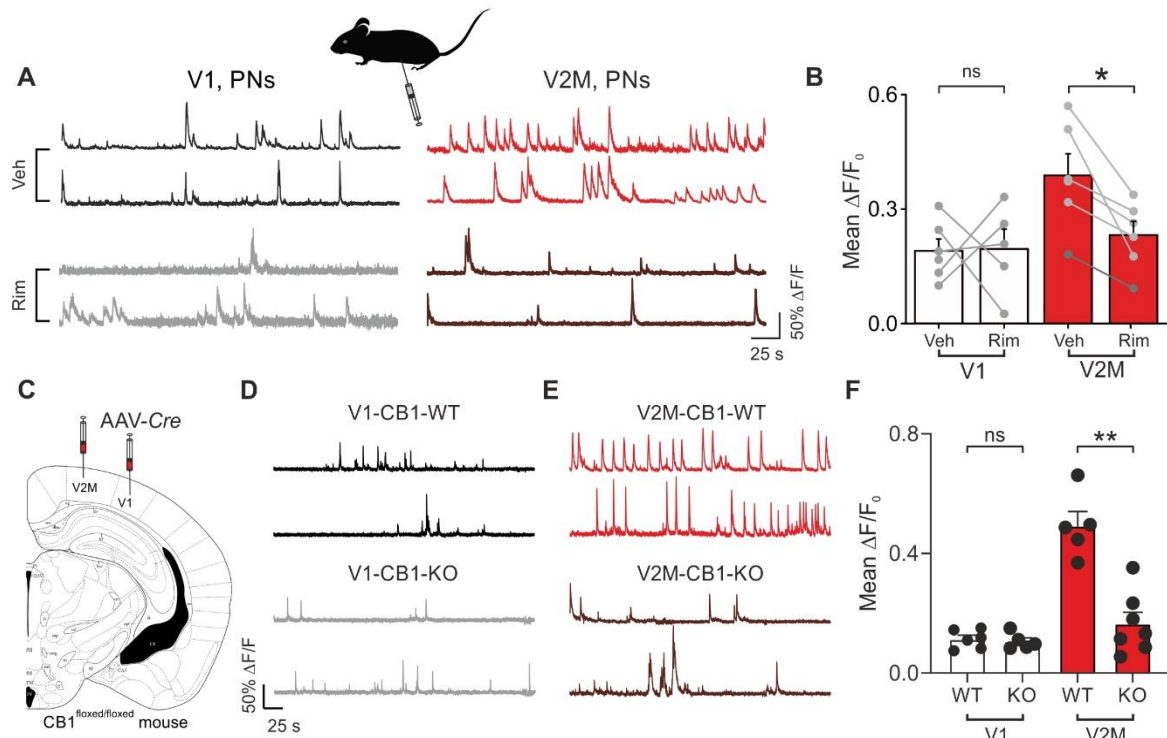

277 Altogether, these results indicate that PNs in V2M fire more than in V1 in basal conditions, consistent

278 with tonic CB1 signaling at a prominent GABAergic synapse impinging their perisomatic region.

279

280 **Visual area-specific tonic CB1 signaling underlies higher activity in V2M than V1.**

281 Higher activity of V2M PNs than V1 PNS could derive from a differential modulation of perisomatic

282 inhibitory control. We have shown that V2M L2/3 PNs were targeted by weaker GABAergic synapses

283 because of persistent CB1 signaling. To confirm that higher PN activity *in vivo* was due to visual area-

284 specific tonic CB1 signaling, we injected mice with the specific CB1 inverse agonist SR 141716A

285 (Rimonabant; 5 mg/kg intraperitoneal) (Saravia et al., 2017). Mice were injected with either vehicle or

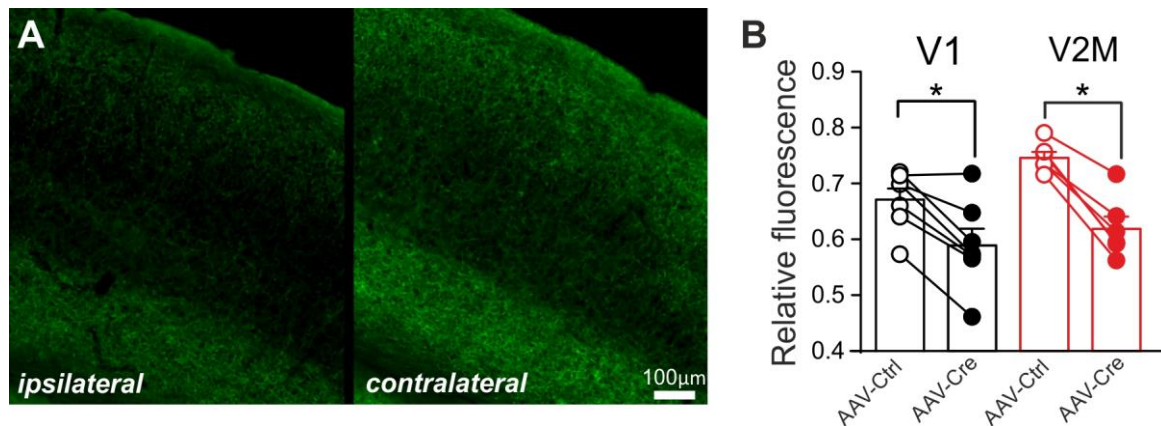

**Figure S7. Quantification of CB1 expression after local AAV-Cre injection in  $CB1^{flxed/flxed}$  mice.**

**A:** Representative micrograph illustrating CB1 immunofluorescence in V1 of a  $CB1^{flxed/flxed}$  mouse injected with AAV-cre viral particles (ipsilateral, left) and its contralateral, non-injected site (right). Site of injection was identified by co-injection of AAV-tdTomato virus. CB1 pattern of expression was obtained using the “straight” imageJ-option with a line width of 49  $\mu\text{m}$ . **B:** Summary graph of CB1 immunofluorescence in AAV-control and AAV-Cre injected mice.

286 Rimonabant (see STAR Methods) and imaging sessions started 30 minutes up to 1 hour post-injection.  
287 We found that Rimonabant did not alter L2/3 neuronal spontaneous activity in V1 (mean  $\Delta F/F_0 =$   
288  $0.1904 \pm 0.03102$  vs.  $0.1954 \pm 0.05205$ , V1, vehicle vs. V1, Rimonabant, respectively;  $n = 6$  and  $5$  mice  
289 in V1, vehicle vs. V1, Rimonabant, respectively;  $p > 0.9999$ ; Wilcoxon matched-pairs signed rank test,  
290 Figure 6A-B). In support of tonic CB1 signaling, the activity of V2M PNs was reduced by  $\sim 40\%$  by  
291 Rimonabant (mean  $\Delta F/F_0 = 0.39 \pm 0.06$  vs.  $0.23 \pm 0.04$ , V2, vehicle vs. V2, Rimonabant, respectively;  $n$   
292  $= 6$  and  $6$  mice in V1, vehicle vs. V1, Rimonabant, respectively;  $p = 0.0312$ ; Wilcoxon matched-pairs  
293 signed rank test, Figure 6A-B). These results indicate that the overall higher activity of L2/3 PNs in V2M  
294 was due to CB1 signaling.  
295 Systemic pharmacological blockade of CB1 does not exclude that the reduction of V2M neuronal  
296 activity was due to a global CB1 effect. In order to downregulate CB1 function in adult mice locally in  
297 either V1 or V2M only, we injected AAVs expressing the recombinase *Cre* under the pCAG promoter  
298 in mice carrying a loxP-flanked CB1 gene ( $CB1^{flxed/flxed}$ ) in either cortical area  $CB1^{flxed/flxed}$  (Figure 6C). This  
299 strategy was shown to knock-down successfully CB1 expression in the targeted areas (Soria-Gomez et  
300 al., 2014; Soria-Gomez et al., 2015). In fact, five weeks post-virus injection resulted in a significant  
301 reduction of CB1 immunoreactivity in either V1 or V2M ( $p = 0.0313$ , Wilcoxon matched-pairs signed  
302 rank test; Figure S7). We found that local genetic knockdown of CB1 did not alter L2/3 PN activity in V1

303 (mean  $\Delta F/F_0 = 0.11 \pm 0.012$  vs.  $0.10 \pm 0.012$ , V1-CB1\_WT vs. V1-CB1-KO, respectively;  $n = 6$  and  $5$  mice,  
304  $p = 0.93$ ; Mann–Whitney U test, Figure 6D-F) but strongly reduced the firing of PNs in V2M (mean  $\Delta F/F_0$   
305  $= 0.49 \pm 0.05$  vs.  $0.16 \pm 0.038$ , V2M-CB1\_WT vs. V2M-CB1-KO, respectively;  $n = 5$  and  $7$  mice,  $p =$   
306  $0.0025$ ; Mann–Whitney U test, Figure 6D-F).

307 These results demonstrate the existence of tonic CB1 signaling *in vivo*, which is restricted to V2M. This  
308 modulation strongly affects neuronal activity specifically in this higher order visual area, likely by  
309 persistently reducing GABA release from CB1 BCs. Overall, these results indicate that these BCs  
310 operate a strong control of PN firing.

311

312 **Modulation of perisomatic inhibition from CB1 BCs affects correlated activity of PNs selectively in**  
313 **V2M.**

314 Perisomatic inhibition can in principle affect the degree of correlated PN activity (Pouille and  
315 Scanziani, 2001; Gabernet et al., 2005; Freund and Katona, 2007; Manseau et al., 2010; Buzsaki,  
316 2010; Lourenco et al., 2014; Lourenco et al., 2020a). However, we found that the relative strength of  
317 perisomatic inhibition from CB1 BCs is strikingly different between V1 and V2M. Therefore, we  
318 extracted the relative timing of the recorded  $Ca^{2+}$  events between PNs in our 2P imaging experiments  
319 and quantified pairwise correlations of PNs in V1 and V2M. To do so, we applied the spike time tiling  
320 coefficient (STTC) method to our  $Ca^{2+}$  imaging data and reduce possible confounding effects linked to  
321 differences in firing rates (see STAR Methods) (Cutts and Eglen, 2014). We first deconvolved  
322 fluorescence traces to extract putative times of spike events as previously done (see STAR Methods)  
323 (Stringer and Pachitariu, 2019). We found that neurons in V2M (characterized by higher activity)  
324 exhibited less correlated activity of  $Ca^{2+}$  events as compared to V1 (STTC:  $0.057 \pm 0.004$  vs  $0.047 \pm$   
325  $0.004$ , V1 vs. V2M;  $n = 70$  and  $62$  time series;  $p = 0.033$ ; Mann–Whitney U test, Figure 7A-B).

326 To test whether the smaller degree of correlation was due to perisomatic control by CB1 BCs, we  
327 analyzed STTC in CB1<sup>floxexd/floxexd</sup> mice injected with AAV-Cre vectors. We found that STTC values were  
328 unchanged in V1 of mice injected with either control or Cre-expressing viruses (STTC:  $0.072 \pm 0.01$  vs

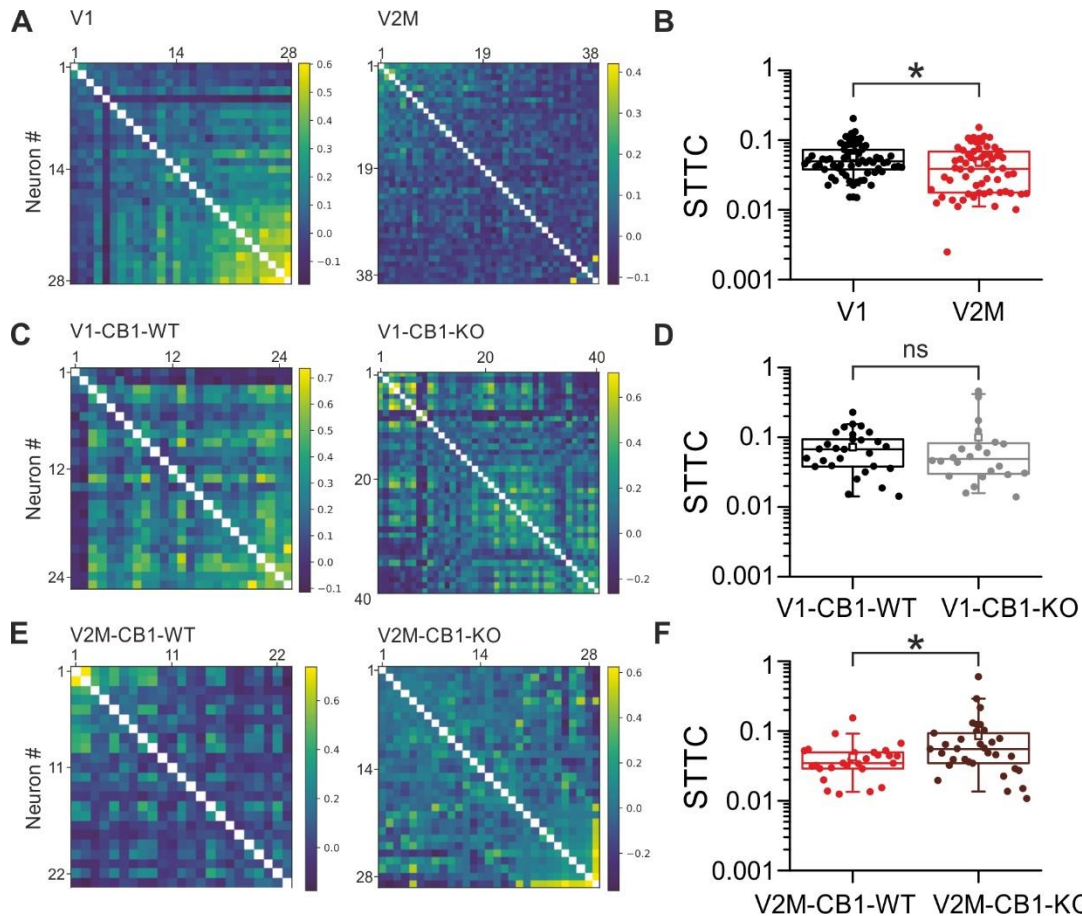

**Figure 7. Modulation of perisomatic inhibition from CB1 BCs affects correlated activity of PNs selectively in V2M.**

**A:** Pairwise correlation matrices of two representative time series in V1 (left) and V2M (right) from CB1-tdTomato mice. The heatmaps indicate low (blue), intermediate (green) and high (yellow) levels of correlated activity. **B:** Population data of the spike time tiling coefficient (STTC) in V1 (black) and V2M (red). STTC is a coefficient quantifying the degree of correlated activity of 2P  $Ca^{2+}$  imaging neurons. Each dot is a time-series. **C-F:** Same as in A-B but for CB1<sup>fl/fl</sup> mice injected with control AAV (CB1-WT) and AVV-Cre (CB1-KO) vectors in V1 (C-D) and V2M (E-F). Color code for different viral vectors and visual areas in D and F as in Fig. 6 D-E

329  $0.099 \pm 0.026$ , V1-CB1-WT vs. V1-CB1-KO;  $n = 29$  and  $24$  time series;  $p = 0.67$ ; Mann–Whitney U test,

330 Figure 7C-D). Interestingly, in addition to reducing overall PN activity (Figure 6), knocking out CB1 in

331 V2M, resulted in a significant increase of correlated activity in this visual area (STTC:  $0.042 \pm 0.005$  vs

332  $0.08 \pm 0.019$ , V2M-CB1-WT vs. V2M-CB1-KO;  $n = 27$  and  $33$  time series;  $p = 0.023$ ; Mann–Whitney U

333 test, Figure 7E-F).

334 In sum, these data indicate that CB1 BCs contribute significantly to orchestrate cortical networks.

335 More strikingly, these results indicate that tonic CB1 signaling represents a simple, albeit powerful

336 mechanism to controls the level of activity and coordination of PNs in different cortical areas.

337

## 338 Discussion

339 In this study, we examined the functional connectivity pattern of CB1 BCs in the mouse visual cortex  
340 in slices and *in vivo*. CB1 BCs are elusive elements of the cortical microcircuit. Their functional  
341 properties are much less known as compared to other inhibitory cell types, such as dendritic targeting  
342 somatostatin (SST) interneurons and PV cells. We found that CB1 expression was higher in V2M across  
343 L2-5 as compared to V1. Moreover, we found that CB1-expressing BCs exhibited similar  
344 electrophysiological and synaptic properties in the two visual cortical areas. However, surprisingly,  
345 they possessed different anatomical and connectivity patterns in V1 vs. V2M. Overall, CB1 BCs in L2/3  
346 of V2M had a much lower efficacy of synaptic release, due to a persistently active CB1 signaling in this  
347 specific layer and cortical visual area (Figure 4C). This area-specific connectivity and eCB modulation  
348 was responsible of a higher although less coordinated activity of PNs in V2M, as compared to V1.

349 Our anatomical data are in good agreement with previously reported differences of  
350 expression of CB1 in different cortical areas (Yoneda et al., 2013). More CB1 in V2M could be due to:  
351 *i)* differences in the number of CB1 interneurons; *ii)* differences in their projections; *iii)* increased  
352 expression of CB1 in each axonal terminal. We found support for both *i)* and *ii)*: we report a significant  
353 larger proportion of CB1 interneurons, and high levels of axonal innervation originating in L2/3 and  
354 invading L4, only in V2M. Regarding *iii)*, our results cannot exclude higher expression of CB1 in V2M,  
355 and future pharmacological studies are required to directly address this question. However, it is  
356 notable that comparable levels of CB1 in L2/3 and L4 of V2M yielded completely different CB1-  
357 dependent modulation of synaptic transmission and plasticity. Moreover, it was shown that tonic CB1-  
358 mediated modulation of GABA release is independent of the expression levels of CB1 on axon  
359 terminals (Ladarré et al., 2014). Higher CB1 expression in V2M could serve multiple cellular functions  
360 (Ladarré et al., 2014), possibly via differential expression in specific subcellular compartments, such  
361 as mitochondria (Hebert-Chatelain et al., 2016).

362 The V2M-specific innervation pattern onto L4 is particularly intriguing. The lack of infra-layer  
363 innervation from CB1 BCs in V1 could be due to a consistent inability of filling axons with biocytin, or

364 a bias in selecting CB1 BCs in specific cortical areas. This is unlikely for at least two reasons. First, the  
365 prominent V2M L4 innervation in filled neurons is in agreement with the CB1 staining pattern. Second,  
366 the probability of finding infra-laminar connected pairs is dramatically different in the two visual areas;  
367 we could find very few connected pairs when the postsynaptic PN was in L4 of V1 (5 pairs out of 74  
368 double recordings). Here we provide evidence of a specific connectivity logic of CB1 BCs from L2/3 in  
369 distinct visual areas. The specific infra-laminar projection of CB1 BCs in V2M might reveal different  
370 circuit motifs in different cortical areas. Indeed, L4 activation by thalamo-cortical fibers is relayed to  
371 L2/3 where it could generate a feedback inhibitory loop operated by CB1 BCs only in associative  
372 cortices. This associative area-specific routing of intracortical information could have important  
373 consequences in sensory perception.

374 Differences in anatomical parameters, such as dendritic and axonal projections have  
375 traditionally been used to distinguish different interneuron subclasses (Markram et al., 2004;Ascoli et  
376 al., 2008;Naka et al., 2019). Accordingly, different morphologically identified cell types exhibit specific  
377 electrophysiological properties (Markram et al., 2004). Here we found that, despite the different  
378 axonal projections in the two visual areas, CB1 BCs exhibited a similar electrophysiological signature.  
379 Moreover, GABAergic synaptic transmission from CB1 BCs share many similarities in the two visual  
380 areas, such as high failure rate and variable short-term dynamics, consistent with their counterparts  
381 in the hippocampus (Hefft and Jonas, 2005;Neu et al., 2007;Daw et al., 2009), amygdala (Rovira-  
382 Esteban et al., 2017) and other cortical areas (Galarreta et al., 2008). This argues against the existence  
383 of distinct subtypes of cortical CB1 BCs in different visual areas, although a thorough molecular  
384 investigation using single-cell transcriptomics will be important to pinpoint possible selective  
385 expression profiles. Importantly, however, GABAergic transmission was much weaker onto L2/3 PNs  
386 of V2M, but this layer- and visual area-specific synaptic efficacy was erased by blocking CB1. This  
387 indicates that the different inhibitory strength exhibited in L2/3 of V2M did not depend on the  
388 specificity of pre- and postsynaptic molecular architecture (Eggermann et al., 2011), but it was due to

389 persistent modulation of GABA release from CB1 BCs, only in this layer of this associative visual area,  
390 resulting in functional synaptic diversity and target specificity.

391 Despite an increase in uIPSC amplitude and a decrease in failure-rate, the lack of change in  
392 PPR in the presence of AM251 is unexpected, but also consistent with other studies (Kim and Alger,  
393 2001;Rovira-Esteban et al., 2017). Thus, PPR with two consecutive IPSCs may not represent an  
394 appropriate measure of presynaptic release probability at these synapses. Indeed, using PPR to infer  
395 presynaptic release probability of GABAergic synapses has been questioned in the hippocampus, due  
396 to spurious facilitation caused by occasional synaptic failure (Kim and Alger, 2001). Importantly,  
397 however, AM-251 application decreased uIPSC failure-rate, consistent with a presynaptic modulation  
398 by CB1 (Neu et al., 2007).

399 Despite selective tonic CB1 modulation, CB1-dependent DSI magnitude was similar at the  
400 three tested connections. This indicates that tonic CB1 signaling in V2M does not saturate the  
401 receptor, which is still sensitive to depolarization-induced, on-demand production of eCBs.  
402 Importantly, however, despite the *relative* DSI amplitude was similar in V1 and V2M, it is noteworthy  
403 to stress here that, from the perspective of single PNs, DSI produced a massive reduction of PN  
404 perisomatic inhibition in L2/3 of V1 (synaptic currents went from several hundred pA to zero). In  
405 contrast, L2/3 PNs of V2M sensed a reduction of perisomatic inhibition from CB1 INs, which was  
406 already weak (~6 fold less powerful) already before DSI stimuli. This differential absolute change of  
407 acute eCB modulation of inhibitory transmission from CB1 interneurons will likely produce distinct  
408 effects in the output spiking properties of single PNs in the two cortical areas.

409 Importantly, CB1-dependent tonic reduction of inhibition has been reported at GABAergic  
410 synapses in the hippocampus (Losonczy et al., 2004;Foldy et al., 2006;Neu et al., 2007), although the  
411 existence of tonic CB1 signaling was disputed (Castillo et al., 2012). This has raised the possibility that  
412 tonic inhibition could depend on the health of the slice preparation and/or recording conditions. Yet,  
413 here we demonstrate in adult tissue that the same CB1 neuron could be responsible for phasic and



414 tonic modulation at different synapses. Moreover, we found that tonic CB1 modulation had a strong  
415 impact in modulating *in vivo* PN firing behavior in V2M selectively.

416 Tonic CB1 activation could be due to different mechanisms, including a constitutively active  
417 receptor in the absence of a natural ligand (Letierrier et al., 2004; Losonczy et al., 2004), or a  
418 persistently activated receptor by a tonic presence and/or synthesis of eCBs (Neu et al., 2007). It has  
419 been suggested that this tonic eCB mobilization from postsynaptic PNs is regulated by mGluRs and  
420 muscarinic receptors (Foldy et al., 2007). Yet, we believe that this tonic modulation of CB1 is due to a  
421 constant presence of eCBs. Indeed, within the same cortical area (V2M) the same axons exhibited  
422 strong and absent tonic CB1 signaling, in L2/3 and L4, respectively, arguing against a target-specific  
423 endogenous state of CB1. It will be interesting to determine the possible sources of eCBs: these could  
424 be postsynaptic neurons or non-neuronal elements in the neuropil (such as astrocytes). Alternatively,  
425 tonic CB1 activation could derive from a layer-specific absence of enzymatic eCB degradation (Ladarre  
426 et al., 2014).

427 Independently of the actual underlying molecular mechanism, it has been shown that tonic  
428 CB1 activity can be overrun by high frequency firing of the presynaptic interneurons (Chen et al.,  
429 2003; Chen et al., 2007; Foldy et al., 2007) or could be facilitated by presynaptic activity (Zhu and  
430 Lovinger, 2007; Heifets et al., 2008; Lourenco et al., 2010). Here we show that the strength of CB1 in-  
431 mediated inhibition depends on the activity state of these inhibitory neurons. Maturation of the visual  
432 cortex and stress conditions could alter CB1 expression and thus represent factors altering CB1  
433 signaling (Jiang et al., 2010; Wamsteeker Cusulin et al., 2014).

434 Weak perisomatic inhibition in V2M might be used as a strategy to modulate postsynaptic PN  
435 firing. Indeed, we observed a much higher spontaneous *in vivo* activity of PNs in this associative area,  
436 as opposed to V1. This is consistent with overall decreased inhibition onto PNs. In sensory cortices,  
437 L2/3 PNs exhibit low-frequency activity, suggesting that they integrate sensory input using sparse  
438 coding (Petersen and Crochet, 2013). We found a stark difference of activity of L2/3 PNs in adjacent  
439 visual cortical areas. One can thus speculate that higher-order visual cortical regions encode sensory

440 information using a different computational strategy. Future experiments will define the actual role  
441 of this difference in firing in the hierarchical flow of sensory information involving primary and  
442 associative cortical areas (Glickfeld and Olsen, 2017;Minderer et al., 2019;Jin and Glickfeld,  
443 2020;Siegle et al., 2021).

444         Yet, is this visual area-specific PN activity level dependent on the strength of GABAergic  
445 neurotransmission onto PNs? In particular, do CB1 BCs contribute to set the activity level of PNs in  
446 different cortical areas? We found that pharmacological blockade and genetic deletion of CB1 reduced  
447 the activity of PNs in V2M to levels similar to V1. The decrease of neuronal activity observed in V2M  
448 after pharmacological CB1 blockade could be ascribed to a brain-wide -or even peripheral- effect.  
449 However, the virtually identical results were obtained by acute and localized genetic deletion of CB1  
450 in V1 or V2M in adult mice, thus strengthening our interpretation that this difference in neuronal  
451 activity is due to tonic CB1 signaling. This result strongly suggests that CB1 INs control the output  
452 activity of PNs. Moreover, this result reveals the presence of tonic CB1 signaling in a specific cortical  
453 area (V2M), in good agreement with our anatomical and synaptic findings (Figs. 1-4).

454         The difference in PN firing in V1 and V2M was not associated with significant firing alterations  
455 of CB1 INs. This suggests that these cells are likely not recruited by local PNs, which exhibit higher  
456 activity in the visual areas. Moreover, the lack of difference in firing frequency between CB1 INs in V1  
457 and V2M suggests a functional decoupling between their firing behavior and synaptic release of GABA.  
458 Indeed, the overall spontaneous activity of CB1 INs may not be sufficient to overcome tonic CB1  
459 inhibition of GABA release.

460         One hallmark of perisomatic inhibition is the ability of controlling the timing of output spiking  
461 of PNs. Indeed, reliable and strong perisomatic inhibition from PV BCs was shown to reduce the jitter  
462 and increase the reliability of their postsynaptic targets (Pouille and Scanziani, 2001;Gabernet et al.,  
463 2005;Lourenco et al., 2014;Lourenco et al., 2020a), thus ending up synchronizing large populations of  
464 PNs and favoring the emergence of rhythmic correlated activity (Bartos et al., 2007;Buzsaki and Silva,  
465 2012). The significant reduction in pairwise correlation that we observed in V2M is consistent with

466 decreased strength of perisomatic inhibition. Indeed, correlated activity is related to higher firing  
467 frequency (de la Rocha et al., 2007), but we observed a lower synchrony in V2M in the presence of  
468 higher firing activity. Local genetic deletion of CB1 did not affect synchrony in V1 but it increased  
469 coordinated activity in V2M. Altogether, these results are consistent with a significant role played by  
470 CB1 BCs in orchestrating cortical networks. This is intriguing, given the paucity of this cell type and  
471 their loose-coupled synapse as compared to the more pervasive PV cells, characterized also by reliable  
472 and fast synaptic transmission (Hefft and Jonas, 2005; Freund and Katona, 2007; Deleuze et al., 2019).  
473 Future experiments will be necessary to unravel the actual synchronization role played by CB1 BCs  
474 with a better temporal resolution, to reveal whether these BCs are involved in fast network  
475 oscillations. The highly specific inhibitory modulation of PN output can profoundly affect the  
476 participation and orchestration of populations of PNs to relevant network oscillations, proposed to  
477 underlie several cognitive functions, including sensory perceptions (Buzsaki, 2010; Siegle et al., 2014).  
478 Interestingly, it has been recently shown that hippocampal CCK/CB1 and PV BCs play a complementary  
479 role during fast network activity, due to mutual inhibitory connections between these IN subclasses  
480 (Dudok et al., 2021). Whether this scheme applies also to different visual cortical areas is not known.  
481 Here, it is tempting to speculate that given our effect of CB1 tonic modulation selectively in V2M,  
482 perisomatic inhibition from CB1 BCs play a predominant role in this specific cortical area.

483         In sum, here we found that different morpho-functional and connectivity properties of a  
484 specific GABAergic IN subtype governs the activity level of a visual cortical area, suggesting that  
485 distinct circuit blueprints can define the function of specific cortical areas during sensory perception.

486

## 487 **Experimental Procedures**

### 488 **Animals**

489 Experimental procedures followed French and European guidelines for animal experimentation and  
490 in compliance with the institutional animal welfare guidelines of the Paris Brain Institute. Experiments  
491 for paired recordings were performed on both sexes aged between P30 and P40 CB1-tdTomato mice

492 (Winters et al., 2012). In some experiments, CB1-tdTomato mice were crossed with GAD67-GFP mice  
493 to identify CB1-expressing INs for cell counting. In experiments for Figure 1, C57BL/6J wild-type were  
494 purchased from Janvier laboratories. Mice were housed in an animal facility with a 12h light/dark  
495 cycle, with food and water available *ad libitum*. Viral injections and chronic cranial windows for 2P  
496 Ca<sup>2+</sup> imaging experiments *in vivo* were performed on two months old male mice of CB1-tdTomato or  
497 CB1<sup>floxed/floxed</sup> mice and imaging sessions started following habituation, four to five weeks post-surgery.

498

### 499 **Immunohistochemistry and cell counting**

500 All animals were deeply anesthetized with ketamine-xylazine and transcardially perfused first with  
501 cold PBS (20ml) followed by 30-40 ml of cold 4% PFA (paraformaldehyde, diluted in PBS). Brains were  
502 removed and post-fixed in 4% PFA overnight at 4°C. For cryoprotection they were next put in 30%  
503 sucrose (diluted in PBS) overnight and frozen at - 45°C in isopentane. The brains were cut with a  
504 freezing microtome (Thermo Fisher), with nominal section thickness set to 20 µm. After rinsing with  
505 PBS, slices were incubated 2h at room temperature in 0.3% PBT (0.3% Triton X in PBS) and 10% BSA  
506 blocking solution. Primary antibodies diluted in 0.3% PBT and 0.1% NGS (normal goat serum) were  
507 incubated overnight at 4°C. The following antibodies were used: anti-CB1 (Frontiers institute, goat  
508 1:400), anti-GFP (Millipore, MAB 3580 mouse 1:500), anti-DsRed (Clontech, rabbit 1:500), anti-PV  
509 (Sigma PARV-19, mouse 1:1000) and anti-SST (Santa Cruz G10 sc-55565, mouse 1:250). The CB1  
510 antibody was raised against a 31 amino acid C-terminal sequence of the receptor, and has been shown  
511 to mainly stain GABAergic axonal fibres, resulting in an immunopositive mesh (Bellochio *et al.*, 2010).  
512 Anti-GFP and anti-DsRed (i.e. tdTomato) were used to enhance the signals of GFP and tdTomato  
513 allowing us to increase the signal to noise ratio, particularly for counting somata. Slices were then  
514 rinsed with PBS and incubated for 2h at room temperature with the secondary antibodies Alexa 488  
515 anti-goat, Alexa 488 anti-mouse and Alexa 633 anti-rabbit, all obtained from Life Technologies and  
516 diluted 1:500 in PBT 0.3%. Slices were mounted with DAPI Fluoromount (Sigma) and stocked at 4°C.

517 Whole brain slices were imaged using an epifluorescence slice scanner (Axio scan Z1 Zeiss,  
518 magnification 20x).

519

### 520 **CB1 immunofluorescence pattern**

521 Only slices in which both V1 and V2M areas were present were analyzed in order to be able to  
522 quantitatively compare the fluorescence patterns. To obtain the pattern, the “straight” option in FIJI  
523 (NIH) with a line width of 390  $\mu\text{m}$  was used to calculate the grey value intensity of CB1 immuno-  
524 staining from pia to white matter. For each slice, the maximum fluorescence intensity over a length of  
525 10  $\mu\text{m}$  of either V1 and V2 was used to normalize fluorescence in the rest of the analyzed areas.  
526 Moreover, due to differences in cortical length between animals and slices, we determined cortical  
527 layer thickness by using a ratio obtained from measuring each layer in the Allen atlas with total cortical  
528 length set as 1.

529

### 530 **Combined Fluorescent in situ hybridization (FISH)/ Immunohistochemistry (IHC) on free-floating** 531 **frozen sections**

532 CB1 FISH/tdTomato immunofluorescence experiments were carried out as previously described  
533 (Marsicano and Lutz, 1999;Oliveira da Cruz et al., 2020). Briefly, free-floating frozen coronal sections  
534 were cut out with a cryostat (20  $\mu\text{m}$ , cryostat Leica CM1950), collected in an antifreeze solution and  
535 conserved at  $-20^{\circ}\text{C}$ . After inactivation of endogenous peroxidases and blocking with 3%  $\text{H}_2\text{O}_2$ , the  
536 tissue was treated with Avidin/Biotin Blocking Kit (SP-2002 Vector Labs, USA) followed by an  
537 incubation overnight at  $4^{\circ}\text{C}$  with antiDsRed rabbit polyclonal primary antibody (1:1000, 632496  
538 Takara Bio) diluted in a triton buffer (0.3% Triton X-100 diluted in PBS-DEPC). The following day, after  
539 several washes, the sections were incubated with a secondary antibody goat anti-rabbit conjugated  
540 to a horseradish peroxidase (HRP) (1:500, 7074S Cell Signaling Technology) during 2 hours at RT  
541 followed by a 10 minutes incubation at RT with TSA plus Biotin System (Biotin TSA 1:250,  
542 NEL749A001KT PerkinElmer). After several washes, the slices were fixed with 4% of formaldehyde

543 (HT501128-4L Sigma Aldrich) for 10 minutes, incubated with 3% of H<sub>2</sub>O<sub>2</sub> for 30 minutes at RT and  
544 blocked with 0.2M HCl for 20 minutes at RT. Then, the tissue was acetylated in 0.1 M Triethanolamine,  
545 0.25% Acetic Anhydride for 10 minutes. Sections were hybridized overnight at 70°C with Digoxigenin  
546 (DIG)-labeled riboprobe against mouse CB1 receptor (1:1000, prepared as described in Marsicano and  
547 Lutz, 1999). After hybridization, the slices were washed with different stringency wash buffers at 70°C.  
548 Then, incubated with 3% of H<sub>2</sub>O<sub>2</sub> for 30 minutes at RT and blocked 1 hour RT with NEN blocking buffer  
549 prepared according to the manufacturer's protocol (FP1012 PerkinElmer). AntiDIG antibody  
550 conjugated to HRP (1:1500, 11207733910 Roche) was applied for 2 hours at RT. The signal of CB1  
551 receptor hybridization was revealed by a TSA reaction using cyanine 3 (Cy3)-labeled tyramide (1:100  
552 for 10 minutes, NEL744001KT PerkinElmer). After several washes, the free-floating sections were  
553 incubated 30 minutes at RT neutravidin dyligth 633 (1:500, 22844 invitrogen). Finally, the slices were  
554 incubated with DAPI (1:20000; 11530306 Fisher Scientific) diluted in PBS, following by several washes,  
555 to finally be mounted, cover slipped and imaged using an epifluorescence slice scanner (Axio scan Z1  
556 Zeiss, magnification 20x) (see below section on "Counting CB1 INs" for analysis).

557 CCK FISH/tdTomato immunofluorescence experiments were carried out as previously described  
558 (Oliveira da Cruz et al., 2020). Briefly, free-floating frozen coronal sections were cut out with a cryostat  
559 (20 µm, cryostat CM1950 Leica), collected in an antifreeze solution and conserved at -20°C. After  
560 inactivation of endogenous peroxidases and blocking with 3% H<sub>2</sub>O<sub>2</sub> the tissue was treated with  
561 Avidin/Biotin Blocking Kit (SP-2002 Vector Labs, USA) followed by an incubation overnight at 4°C with  
562 antiDsRed rabbit polyclonal primary antibody (1:1000, 632496 Takara Bio) diluted in a triton buffer  
563 (0.3% Triton X-100 diluted in PBS-DEPC). The following day, after several washes, the sections were  
564 incubated with a secondary antibody goat anti-rabbit conjugated to a horseradish peroxidase (HRP)  
565 (1:500, 7074S Cell Signaling Technology) during 2 hours at RT followed by a 10 minutes incubation at  
566 RT with TSA Biotin System (Biotin TSA 1:100, NEL700A001KT PerkinElmer). After several washes, the  
567 slices were fixed with 4% of formaldehyde (HT501128-4L Sigma Aldrich) for 10 minutes and blocked  
568 with 0.2M HCl for 20 minutes at RT. Then, the tissue was acetylated in 0.1 M Triethanolamine, 0.25%

569 Acetic Anhydride for 10 minutes. Sections were hybridized overnight at 60°C with Digoxigenin (DIG)-  
570 labeled riboprobe against CCK (1:1000, (Marsicano and Lutz, 1999)). After hybridization, the slices  
571 were washed with different stringency wash buffers at 65°C. Then, incubated with 3% of H<sub>2</sub>O<sub>2</sub> for 30  
572 minutes at RT and blocked 1 hour RT with NEN blocking buffer prepared according to the  
573 manufacturer's protocol (FP1012 PerkinElmer). AntiDIG antibody conjugated to HRP (1:2000,  
574 11207733910 Roche) was applied for 2 hours at RT. The signal of CCK hybridization was revealed by a  
575 TSA reaction using fluorescein isothiocyanate (FITC)-labeled tyramide (1:100 for 10 minutes,  
576 NEL741001KT Perkin Elmer). After several washes, the free-floating sections were incubated overnight  
577 at 4°C with Streptavidin-Texas Red (1:400, NEL721001EA PerkinElmer). Finally, the slices were  
578 incubated with DAPI (1:20000; 11530306 Fisher Scientific) diluted in PBS, following by several washes,  
579 to finally be mounted, coverslipped and imaged using an epifluorescence slice scanner (Axio scan Z1  
580 Zeiss, magnification 20x) (see below section on "Counting CB1 INs" for analysis).

581

## 582 **Counting CB1 INs**

583 CB1-tdTomato/GAD67-GFP positive cells were counted in both V1 and V2; for each area a region of  
584 interest (ROI) was drawn. The ITCN (Image-based Tool for Counting Nuclei) plugin in ImageJ was  
585 modified (courtesy of Brahim Abbes, Neurostack) in order to be able to count the cells and their  
586 distance from the pia simultaneously. The pia was traced on each image, and cells expressing both  
587 tdTomato and GFP were manually marked. Indeed, although the ITCN was designed to automatically  
588 count cells, the widespread expression of tdTomato in both soma and neurites made automatic  
589 detection too unreliable. The software then calculated the minimal distance from marked cells to the  
590 pia. Once these distances were established, we were able to bin cell counts in the different layers of  
591 the cortex. Layer (bin) size was determined using the online mouse reference atlas, determining the  
592 % of cortical thickness each layer represented. We then used these ratios to calculate actual layer  
593 thickness on our slices. Also, ROIs could differ widely in width, hence to compensate for this we divided  
594 the obtained laminar density by the width of the ROI.

595 For the CB1-tdTomato/5HT3-GFP, CB1-TdTomato/Cnr1 and CB1-tdTomato/CCK positive cells count,  
596 the same plugin was used with a new feature added (Neurostack, courtesy of Brahim Abbas): CB1-  
597 tdTomato cell area. Layer size and thickness were then determined in the same way as above.

598

### 599 **In Vitro Slice Preparation for Electrophysiological Recordings**

600 Coronal slices (350  $\mu\text{m}$  thick) of visual cortex were obtained from mice of both sexes aged between  
601 P30 and P40. The area of interest was identified using the Allen adult mouse brain reference atlas.  
602 Animals were deeply anaesthetized with a mix containing 120 mg/kg ketamine and 24 Xylazine mg/kg  
603 of body weight (in 0.9% NaCl). A transcardiac perfusion was performed using an ice cold “cutting”  
604 solution containing the following (in mM): 126 choline chloride, 16 glucose, 26  $\text{NaHCO}_2$ , 2.5 KCl, 1.25  
605  $\text{NaH}_2\text{PO}_4$ , 7  $\text{MgSO}_4$ , 0.5  $\text{CaCl}_2$ , (equilibrated with 95%  $\text{O}_2$  / 5%  $\text{CO}_2$ ). Following decapitation, brains were  
606 quickly removed and sliced with a vibratome (Leica) while immersed in ice cold cutting solution. Slices  
607 were then incubated in oxygenated (95%  $\text{O}_2$  / 5%  $\text{CO}_2$ ) artificial cerebrospinal fluid (ACSF) containing  
608 the following (in mM): 126 NaCl, 20 glucose, 26  $\text{NaHCO}_3$ , 2.5 KCl, 1.25  $\text{NaH}_2\text{PO}_4$ , 1  $\text{MgSO}_4$ , 2 $\text{CaCl}_2$  (pH  
609 7.4, 310-320mOsm/L), at 34°C for 20 min, and subsequently at room temperature before transferring  
610 to the recording chamber. The recording chamber was constantly perfused with warm (32°C),  
611 oxygenated ACSF at 2.5-3 mL/min.

612

### 613 **Electrophysiology**

614 Synaptic currents were recorded in whole-cell voltage or current clamp mode in principal cells of  
615 either L2/3 or L4 of primary and secondary visual cortex. Excitatory cells of L2/3 were visually identified  
616 by their triangular soma and apical dendrites projecting towards the pia, while in L4 they were  
617 identified by their round soma and by verifying their regular firing properties. Meanwhile, CB1 BCs  
618 were targeted using CB1-tdTomato fluorescence elicited by a green ( $\lambda=530$  nm) LED (Cairn research)  
619 coupled to the epifluorescence path of the microscope, alongside their characteristic large soma and  
620 bi- or multipolar dendritic morphology. To study the passive properties of CB1 BCs, action potential



621 waveform and firing dynamics, electrodes were filled with an intracellular solution containing (in mM):  
622 135 K-gluconate, 5 KCl, 10 Hepes, 0.01 EGTA, 4 Mg-ATP, 0.3 Na-GTP and 10 phosphocreatine di(tris).  
623 The pH adjusted with KOH to 7.2 resulting in an osmolarity of 290-300 mOsm. Based on the Nernst  
624 equation, the estimated reversal potential for chloride (ECl) was approximately  $-84$  mV. For these  
625 experiments, the following drugs were also present in the superfusate (in  $\mu$ M): 10 DNQX (Tocris), 10  
626 gabazine, and 50 D-APV (all from Tocris).  
627 To record GABAergic uPSCs from paired recordings, we used a “high chloride” intracellular solution  
628 containing (in mM): 70 K-gluconate, 70 KCl, 10 Hepes, 0.2 EGTA, 2 MgCl<sub>2</sub>, 0.5 CaCl<sub>2</sub>, 4 Mg-ATP, 0.3  
629 Na-GTP, 5 phosphocreatine di(tris); again, the pH was adjusted to 7.2 with KOH and resulted in an  
630 osmolarity of 290-300 mOsm. For this solution, the ECl was calculated to be at  $\sim -13$  mV based on the  
631 Nernst equation, which means that when clamping the cell at  $-70$  mV, activation of GABA<sub>A</sub> receptors  
632 resulted in inward currents. We confirmed that the currents were GABAergic by demonstrating they  
633 were unaffected by DNQX (10  $\mu$ M) (Tocris Bioscience) and extinguished by gabazine (10  $\mu$ M; *data not*  
634 *shown*). In most paired-recording experiments, the ACSF was left drug-free as CB1 BCs were reliably  
635 targeted. Signals were amplified using a Multiclamp 700B patch-clamp amplifier (Axon Instruments),  
636 digitized with a Digidata 1440A (Axon Instruments), sampled at 50 kHz and filtered at 2 kHz or 10 kHz,  
637 respectively for voltage and current clamp recordings.

638

### 639 **Stimulation protocols**

640 pClamp v. 10.3 (Axon instruments) was used to record the signal and generate stimulation protocols.  
641 All voltage-clamp protocols contained a 5 mV step used to monitor the series resistance (Rs), which  
642 was kept under 25 M $\Omega$ . Recordings in which the Rs had deviated by more than 20% were discarded.  
643 For paired recordings, a brief pulse was used to elicit a single action current, followed by a train of 5  
644 pulses at 50 Hz. This pattern was repeated every 5s (0.2 Hz). In Figure 3, in order to test for presynaptic  
645 modulation, four trains of action potentials (10 pulses at 50 Hz, inter-train interval of 300ms) were  
646 elicited in the presynaptic CB1 BC.

647 *DSI*: DSI was induced in voltage clamp by holding the post-synaptic cell at 0 mV for 5 s in the post-  
648 synaptic cell. Because we encountered high failure rates and no clear trend in use-dependent short-  
649 term plasticity (see PPR in Figure 2), we averaged the uIPSC amplitudes of the entire train 5 pulses at  
650 50Hz to obtain a single amplitude for each sweep, allowing us to have stable baselines and time-  
651 courses following depolarisation. Between three and five depolarisations were performed on each  
652 cell, separated by at least 2 min.

653 *AM251 pharmacology*: in experiments using the CB1 antagonist AM251 (3  $\mu$ M) (Tocris and AdooQ  
654 biosciences), the drug (diluted in DMSO, less than 0.1% in ACSF) was added directly to the resting  
655 chamber.

656

#### 657 **Data Analysis for Electrophysiological Recordings**

658 *Action potential (AP) waveform and firing profile*: AP waveform was analyzed using Clampfit 10.3  
659 (Molecular Devices). The threshold was defined as the first moment in which the slope of the action  
660 potential crosses a threshold typically set at 30 mV/ ms, then determining the rise time and peak of  
661 the AP. The adaptation coefficient was determined at max firing rate, by dividing the steady state spike  
662 instantaneous frequency (last two APs of depolarizing step) by the initial instantaneous frequency  
663 (first two APs of depolarizing step). Input resistance was measured in the late portion of the  
664 membrane potential relaxation from a step current injection of  $-100$  pA, while the membrane time  
665 constant ( $\tau$ ) was obtained from fitting a single exponential to the early portion of the step until  
666 relaxation. Using these parameters, the capacitance was obtained arithmetically ( $C=\tau/R$ ).  $V_{rest}$  was  
667 measured during stable current clamp recordings without current injection. The relative variability of  
668 the inter-spike interval was determined by computing the coefficient of variation of the times between  
669 two consecutive APs. The full width at half maximum (FWHM) was determined by determining the  
670 width of the AP at half of its total amplitude (from threshold to peak).

671 uIPSC amplitudes were obtained using a custom script in MATLAB. Failures were defined as any value  
672 inferior to twice the standard deviation of the noise.

673

674 **Morphological reconstruction**

675 *Biocytin Fills:* To reliably reconstruct the fine axonal branches of mature CB1 INs, dedicated  
676 experiments were performed. Biocytin (Sigma) was added to the intracellular solution at a high  
677 concentration (0.5g/100ml) (Jiang et al., 2015), which required extensive sonication. To avoid  
678 excessive degradation of fragile molecules such as ATP, sonication was performed in an ice bath. The  
679 intracellular solution was then filtered twice to prevent the presence of undissolved lumps of biocytin  
680 in the patch pipette. Extra care was applied in verifying that the micromanipulators and slice were  
681 stable for recordings of at least 1h. During that time, neurons were injected with large depolarizing  
682 currents in current clamp mode for fifteen times (100ms, 1-2nA, 1Hz). At the end of recordings, the  
683 patch pipette was removed carefully with the aim of resealing the cell properly, equivalent to  
684 obtaining an inside out patch. The slice was then left in the recording chamber for a further 5-10 min  
685 to allow further diffusion. Slices were then fixed with 4% paraformaldehyde in phosphate buffer saline  
686 (PBS, Sigma) for at least 48 h. Following fixation, slices were incubated with the avidin-biotin complex  
687 (Vector Labs) and a high concentration of detergent (Triton-X100, 5%) for at least two days before  
688 staining with 3,3'Diaminobenzidine (DAB, AbCam).

689 Cells were then reconstructed and cortical layers delimited using neuroLucida 7 (MBF Bioscience) and  
690 the most up to date mouse atlas (Allen Institute). Because cortical layer thickness differs within and  
691 across areas, we normalized neurite lengths relative to layer thickness to obtain the most accurate  
692 measure of density in each layer using an arithmetic method (Bortone et al., 2014). To obtain heat  
693 maps, we imported reconstructions in Illustrator (Adobe) and aligned the soma horizontally, and pia  
694 and white matter vertically. From there, individual bitmaps were generated separating dendrites and  
695 axons. These were subsequently blurred in ImageJ (NIH) using a gaussian filter with a radius equivalent  
696 to 20  $\mu\text{m}$ . The contrast of blurred images was then adjusted to obtain the highest possible pixel  
697 intensity, and were then overlapped and averaged. The resulting group average image was also

698 adjusted to the highest pixel intensity, and a lookup table (ImageJ's "Fire", inverted) was applied to  
699 color code the density of neurites across cortical layers.

700

### 701 **Virus injections and chronic cranial window preparation**

702 Virus injections and implantation of the cranial windows were performed as previously described  
703 (Koukoulis et al., 2017). Mice were anesthetized using a mixture of ketamine (Imalgem 1000; Rhone  
704 Mérieux) and xylazine (Rompun; Bayer AG), 10 ml/kg i.p. and placed into a stereotaxic frame. The body  
705 temperature was maintained at ~37 °C using a regulated heating blanket and a thermal probe. Eye  
706 ointment was applied to prevent dehydration. Before skin incision, mice were treated with  
707 buprenorphine (0.1 mg/kg i.p.) and lidocaine (0.4 mL/kg of a 1% solution, local application). After hair  
708 removal and disinfection with betadine and ethanol, the skin was opened, and the exposed cranial  
709 bone was cleaned and dried with cotton pads. Using a dental drill, the skull was thinned and a 5mm  
710 diameter bone was removed with the dura intact. For calcium imaging of cortical neurons, 200 nl of  
711 AAV1.syn.GCaMP6f.WPRE.SV40 ( $1 \times 10^{13}$  vg/ml, University of Pennsylvania Vector Core) was injected  
712 at the following coordinates, V1:AP, -2.54 mm from bregma, L, +2.5; DV, -0.3 to - 0.1 mm and V2M:  
713 AP, -2.54 mm from bregma, L, +1.25; DV, -0.3 to - 0.1 mm from the skull using a Nanoject II™  
714 (Drummond Scientific) at a slow infusion rate (23 nL/s). For local deletion of CB1 receptors in layers  
715 2/3 of V1 or V2M, CB1<sup>flxed/flxed</sup> mice were injected with an AAV-CAG-Cre (0.5 µl) (Soria-Gomez et al.,  
716 2014) or a control virus AAV1.CAG.tdTomato.WPRE.SV40 ( $1.52 \times 10^{13}$  GC/ml, University of Pennsylvania  
717 Vector Core). Animals were used for experiments five weeks after injection in order to have an optimal  
718 deletion of CB1, as previously described (Soria-Gomez et al., 2014;Soria-Gomez et al., 2015). After  
719 injection, the pipette was left in situ for an additional 5 min to prevent backflow. A circular cover glass  
720 (5 mm diameter) was placed over the exposed region and the glass edge was sealed to the skull with  
721 dental cement (Coffret SUPERBOND complete, Phymep). A circle stainless steel head post (Luigs &  
722 Neumann) was fixed to the mouse skull using dental cement.

723

724 **Habituation of the mice for awake imaging**

725 Three weeks after the cranial surgery, mice were first habituated to the experimenter by handling.  
726 Mice were then accustomed to the imaging environment, where they freely moved on a rotating disk  
727 while being head-fixed. Habituation was performed for one week and mice did not receive any reward  
728 under any condition.

729

730 ***In vivo* two-photon calcium imaging**

731 Imaging was performed using a two-photon microscope (Bruker Ultima) equipped with resonant galvo  
732 scan mirrors controlled by the Prairie software. Images were acquired using a water-immersion 20X  
733 objective (N20x-PFH, NA 1, Olympus). A 80-MHz Ti:Sapphire laser (Mai Tai DeepSee, Spectra-Physics)  
734 at 950nm was used for excitation of GCaMP6f and td-Tomato. Laser power did not exceed 30 mW  
735 under the objective. Fluorescence was detected by a GaAsP PMT (H7422PA-40 SEL, Hamamatsu).  
736 Time-series movies of neuronal populations expressing GCaMP6f were obtained at the frame rate of  
737 30.257 Hz (294 x 294  $\mu\text{m}$ , FOV; 0.574  $\mu\text{m}$ /pixel). The duration of each focal plane movie was 330.5  
738 seconds (10,000 frames). Animals were head-restrained and free to locomote on a disk treadmill (30  
739 cm diameter) and kept under the two-photon microscope maximally for 70 minutes per day. The  
740 speed of each mouse on the rotating disk was continuously monitored using a rotary encoder (US  
741 Digital; H5-1024-IE-S; 1000 cpr) connected to a digitizer (Axon Digidata 1440, Molecular Devices) and  
742 analyzed with custom-written software in Python. Signals were recorded at 2KHz and downsampled  
743 to 30 Hz for analysis. For the calculation of speed, we multiplied the perimeter of the disk to the  
744 number of turns and then divided by the elapsed time.

745 To pharmacologically block CB1 we used the inverse agonist SR 141716A (Rimonabant). CB1-tdTomato  
746 mice were injected i.p. with Rimonabant (5 mg/kg, TOCRIS) or vehicle (1.25% (vol/vol) DMSO, 1.25%  
747 (vol/ vol) Tween80 in saline (Bellocchio et al., 2013) 30 minutes before the onset of the imaging  
748 session.

749

750 **Imaging data processing**

751 Motion correction of the two-photon time-series was performed using a registration algorithm built  
752 into the Suite2p software (Stringer and Pachitariu, 2019). Segmentation into regions of interest (ROIs)  
753 was performed with Suite2p, confirmed by visual inspection and fluorescence traces extracted from  
754 the green channel for the different ROIs. Ca<sup>2+</sup> traces were corrected for neuropil contamination. The  
755 neuropil mask resembled a band surrounding the ROI with its inner edge having a distance of 3  
756 microns away from the edge of ROI and its outer edge having a distance of 30 microns from the edge  
757 of the ROI. The resulting neuropil trace, N, was subtracted from the calcium trace, F, using a correction  
758 factor a:  $F_c(t) = F(t) - a \cdot N(t)$  where a was defined as 0.7 like previously described ((Stringer and  
759 Pachitariu, 2019). Changes in fluorescence were then quantified as  $\Delta F/F_0$  where  $F_0$  was estimated as  
760 the average fluorescence value from a moving window of 60 seconds in order to remove slow time  
761 scale changes (Romano et al., 2017).

762

763 **Spike Deconvolution and spike tiling coefficient (STTC) calculation**

764 STTC analysis was performed on deconvolved fluorescence traces as previously described (Cutts and  
765 Eglén, 2014). Briefly, a nonnegative spike deconvolution was applied to GCaMP6f fluorescence traces  
766 using the OASIS algorithm (implemented in Suite2P) with a fixed time scale of calcium indicator decay  
767 of 0.7s. Events corresponding to variations in fluorescence with an amplitude lower than 3 times the  
768 standard deviation (STDV) of the  $\Delta F/F_0$  trace were excluded. STDV was calculated by fitting a Gaussian  
769 process to the negative  $\Delta F/F_0$  fluctuations of each ROI (Romano et al., 2017). To quantify the  
770 correlation between event trains in pairs of ROIs (A and B), we look for events in A which fall within  
771  $\pm \Delta t$  of an event from B. This spike tiling coefficient reduces contribution of different firing rates in  
772 estimating correlations in neuronal spike times. The STTC value for sequences of calcium events in two  
773 ROIs, A and B, were calculated according to:

774 
$$STTC = \frac{1}{2} \left( \frac{P_A - T_B}{1 - P_A T_B} + \frac{P_B - T_A}{1 - P_B T_A} \right)$$

775 Where  $T_A$  is the proportion of total recording time which lies within  $\pm\Delta t$  of any event in A.  $T_B$  was  
776 calculated in a similar manner. A  $\Delta t$  of 300 ms was used to take into account the slow rise time of  
777 GCaMP6f that limits precise temporal estimation of deconvolved events (Stringer and Pachitariu,  
778 2019).  $P_A$  corresponds to the proportion of spikes from A which fall within  $\Delta t$  of any spike from B.  $P_B$   
779 was calculated similarly. STTC values were calculated for all pairs of ROIs within the same individual  
780 field of view.

781

## 782 **Statistical Analysis**

783 All statistical analysis were performed in Prism (GraphPad) or OriginPro (2016; OriginLab Co.). The  
784 normality of data was systematically tested with a D'Agostino and Pearson omnibus normality test.  
785 When normal, two datasets were compared using independent t-tests. When more than two data sets  
786 were compared, one-way ANOVAs and two-way ANOVAs were used. In situations where data was not  
787 normal or samples were small, we used non-parametric tests (Mann Whitney t-test and Kruskal-Wallis  
788 test followed by Dunn's multiple comparison test for more than two groups, respectively) unless  
789 stated otherwise. For paired comparisons, we used paired t-test and Wilcoxon matched-pairs signed  
790 rank test for normally and non-normally distributed datasets, respectively. Differences were  
791 considered significant if  $p < 0.05$  (\* $p < 0.05$ , \*\* $p < 0.01$ , \*\*\* $p < 0.001$ ) and means are always presented  
792 with the SEM.

793

794

795

## 796 **Acknowledgements**

797 We thank Brahim Abbes for providing the Fiji plugin (Neurostack) for soma co-localization analysis and  
798 quantification. We would like to thank Ronan Chéreau and Michael Graupner for initial help in 2P-  
799 imaging implementation. We also thank members of the Bacci laboratory for helpful discussions. We  
800 also thank the ICM technical staff of the facilities PHENO-ICMICE, iGENSEQ and Histomics. All animal

801 work was conducted at the PHENO-ICMice facility. We gratefully acknowledge Joanna Droesbeke for  
802 performing part of the transcordial perfusions. F.K. would like to thank the Fondation des Treilles for  
803 awarding her the 2020 Young Researchers Prize. This work was supported by “Investissements  
804 d’avenir” ANR-10-IAIHU-06; Agence Nationale de la Recherche (ANR-13-BSV4-0015-01 ; ANR-16-CE16-  
805 0007-02 ; ANR-17-CE16-0026-01 ; ANR-18-CE16-0011-01 ; ANR-20-CE16-0011-01); Fondation  
806 Recherche Medicale (Equipes FRM – DEQ20150331684; Equipes FRM – EQU201903007860); DIM  
807 Region Ile de France, and a grant from the Institut du Cerveau et de la Moelle épinière (Paris) (A.B.);  
808 European Research Council (Starting Grant #678250) and the Brain & Behavior Research Foundation  
809 (NARSAD young investigator grant) (N.R.); the German Research Foundation through the Cluster of  
810 Excellence (EXC2067) Multiscale Imaging and the collaborative research center 889 (project B3) to  
811 OMS. The Core ICM facilities were supported by 2 “Investissements d’avenir” (ANR-10- IAIHU-06 and  
812 ANR-11-INBS-0011-NeurATRIS) and the “Fondation pour la Recherche Médicale”.

813

## 814 **Author Contributions**

815 M.M., F.K., A.B. and J.L. designed the research; M.M., F.K., A.A., J.P., M.V., F.J.K., C.A., P.M. and J.L.  
816 collected data; M.M., F.K., A.A., J.P. and J.L., analyzed data; V.C., M.D.B.V.V., N.R. and A.B. provided  
817 analytical tools; G.M. and O.M.S. provided CB1 mouse lines and viral vectors; A.B. and J.L. co-  
818 supervised the project. M.M., F.K., A.B and J.L. wrote the manuscript. All authors edited the  
819 manuscript.

820

## 821 **References**

822 Allene,C., Lourenco,J., and Bacci,A. (2015). The neuronal identity bias behind neocortical GABAergic  
823 plasticity. *Trends Neurosci.* 38, 524-534.

824 Ascoli,G.A., Alonso-Nanclares,L., Anderson,S.A., Barrionuevo,G., Benavides-Piccione,R., Burkhalter,A.,  
825 Buzsaki,G., Cauli,B., DeFelipe,J., Fairen,A., Feldmeyer,D., Fishell,G., Fregnac,Y., Freund,T.F.,  
826 Gardner,D., Gardner,E.P., Goldberg,J.H., Helmstaedter,M., Hestrin,S., Karube,F., Kisvarday,Z.F.,  
827 Lambolez,B., Lewis,D.A., Marin,O., Markram,H., Munoz,A., Packer,A., Petersen,C.C., Rockland,K.S.,  
828 Rossier,J., Rudy,B., Somogyi,P., Staiger,J.F., Tamas,G., Thomson,A.M., Toledo-Rodriguez,M., Wang,Y.,



- 829 West,D.C., and Yuste,R. (2008). Petilla terminology: nomenclature of features of GABAergic  
830 interneurons of the cerebral cortex. *Nat. Rev. Neurosci.* *9*, 557-568.
- 831 Atallah,B.V., Bruns,W., Carandini,M., and Scanziani,M. (2012). Parvalbumin-expressing interneurons  
832 linearly transform cortical responses to visual stimuli. *Neuron* *73*, 159-170.
- 833 Bartos,M., Vida,I., and Jonas,P. (2007). Synaptic mechanisms of synchronized gamma oscillations in  
834 inhibitory interneuron networks. *Nat. Rev. Neurosci.* *8*, 45-56.
- 835 Bellocchio,L., Soria-Gómez,E., Quarta,C., Metna-Laurent,M., Cardinal,P., Binder,E., Cannich,A.,  
836 Delamarre,A., Häring,M., Martín-Fontecha,M., Vega,D., Leste-Lasserre,T., Bartsch,D., Monory,K.,  
837 Lutz,B., Chaouloff,F., Pagotto,U., Guzman,M., Cota,D., and Marsicano,G. (2013). Activation of the  
838 sympathetic nervous system mediates hypophagic and anxiety-like effects of CB<sub>1</sub> receptor blockade.  
839 *Proc. Natl. Acad. Sci. U. S. A* *110*, 4786-4791.
- 840 Bodor,A.L., Katona,I., Nyiri,G., Mackie,K., Ledent,C., Hajos,N., and Freund,T.F. (2005).  
841 Endocannabinoid signaling in rat somatosensory cortex: laminar differences and involvement of  
842 specific interneuron types. *J. Neurosci* *25*, 6845-6856.
- 843 Bortone,D.S., Olsen,S.R., and Scanziani,M. (2014). Translaminar inhibitory cells recruited by layer 6  
844 corticothalamic neurons suppress visual cortex. *Neuron* *82*, 474-485.
- 845 Buzsaki,G. (2010). Neural syntax: cell assemblies, synapse ensembles, and readers. *Neuron* *68*, 362-385.
- 846 Buzsaki,G., and Silva,F.L. (2012). High frequency oscillations in the intact brain. *Prog. Neurobiol.* *98*,  
847 241-249.
- 848 Buzsaki,G., and Wang,X.J. (2012). Mechanisms of gamma oscillations. *Annu. Rev. Neurosci.* *35*, 203-  
849 225.
- 850 Castillo,P.E., Younts,T.J., Chavez,A.E., and Hashimoto,Y. (2012). Endocannabinoid signaling and  
851 synaptic function. *Neuron* *76*, 70-81.
- 852 Chen,K., Neu,A., Howard,A.L., Földy,C., Echegoyen,J., Hilgenberg,L., Smith,M., Mackie,K., and  
853 Soltesz,I. (2007). Prevention of plasticity of endocannabinoid signaling inhibits persistent limbic  
854 hyperexcitability caused by developmental seizures. *J. Neurosci.* *27*, 46-58.
- 855 Chen,K., Ratzliff,A., Hilgenberg,L., Gulyas,A., Freund,T.F., Smith,M., Dinh,T.P., Piomelli,D., Mackie,K.,  
856 and Soltesz,I. (2003). Long-term plasticity of endocannabinoid signaling induced by developmental  
857 febrile seizures. *Neuron* *39*, 599-611.
- 858 Clancy,K.B., Orsolic,I., and Mrsic-Flogel,T.D. (2019). Locomotion-dependent remapping of distributed  
859 cortical networks. *Nat. Neurosci.* *22*, 778-786.
- 860 Cutts,C.S., and Eglén,S.J. (2014). Detecting pairwise correlations in spike trains: an objective  
861 comparison of methods and application to the study of retinal waves. *J. Neurosci.* *34*, 14288-14303.
- 862 Daw,M.I., Tricoire,L., Erdelyi,F., Szabo,G., and McBain,C.J. (2009). Asynchronous transmitter release  
863 from cholecystinin-containing inhibitory interneurons is widespread and target-cell independent. *J.*  
864 *Neurosci.* *29*, 11112-11122.
- 865 de la Rocha,J., Doiron,B., Shea-Brown,E., Josic,K., and Reyes,A. (2007). Correlation between neural  
866 spike trains increases with firing rate. *Nature* *448*, 802-806.

- 867 Deleuze,C., Bhumbra,G.S., Pazienti,A., Lourenco,J., Mailhes,C., Aguirre,A., Beato,M., and Bacci,A.  
868 (2019). Strong preference for autaptic self-connectivity of neocortical PV interneurons facilitates their  
869 tuning to gamma-oscillations. *PLoS Biol.* *17*, e3000419.
- 870 Dudok,B., Klein,P.M., Hwaun,E., Lee,B.R., Yao,Z., Fong,O., Bowler,J.C., Terada,S., Sparks,F.T.,  
871 Szabo,G.G., Farrell,J.S., Berg,J., Daigle,T.L., Tasic,B., Dimidschstein,J., Fishell,G., Losonczy,A., Zeng,H.,  
872 and Soltesz,I. (2021). Alternating sources of perisomatic inhibition during behavior. *Neuron* *109*, 997-  
873 1012.
- 874 Eggermann,E., Bucurenciu,I., Goswami,S.P., and Jonas,P. (2011). Nanodomain coupling between  
875  $Ca^{2+}$  channels and sensors of exocytosis at fast mammalian synapses. *Nat. Rev. Neurosci.* *13*, 7-21.
- 876 Foldy,C., Lee,S.Y., Szabadics,J., Neu,A., and Soltesz,I. (2007). Cell type-specific gating of perisomatic  
877 inhibition by cholecystokinin. *Nat. Neurosci.* *10*, 1128-1130.
- 878 Foldy,C., Neu,A., Jones,M.V., and Soltesz,I. (2006). Presynaptic, activity-dependent modulation of  
879 cannabinoid type 1 receptor-mediated inhibition of GABA release. *J. Neurosci.* *26*, 1465-1469.
- 880 Freund,T.F., and Katona,I. (2007). Perisomatic inhibition. *Neuron* *56*, 33-42.
- 881 Gabernet,L., Jadhav,S.P., Feldman,D.E., Carandini,M., and Scanziani,M. (2005). Somatosensory  
882 integration controlled by dynamic thalamocortical feed-forward inhibition. *Neuron* *48*, 315-327.
- 883 Galarreta,M., Erdelyi,F., Szabo,G., and Hestrin,S. (2008). Cannabinoid sensitivity and synaptic  
884 properties of 2 GABAergic networks in the neocortex. *Cereb. Cortex* *18*, 2296-2305.
- 885 Glickfeld,L.L., and Olsen,S.R. (2017). Higher-Order Areas of the Mouse Visual Cortex. *Annu. Rev. Vis.*  
886 *Sci.* *3*, 251-273.
- 887 Hajos,N., Katona,I., Naiem,S.S., Mackie,K., Ledent,C., Mody,I., and Freund,T.F. (2000). Cannabinoids  
888 inhibit hippocampal GABAergic transmission and network oscillations. *Eur. J. Neurosci* *12*, 3239-3249.
- 889 Harris,K.D., and Shepherd,G.M. (2015). The neocortical circuit: themes and variations. *Nat. Neurosci.*  
890 *18*, 170-181.
- 891 Hebert-Chatelain,E., Desprez,T., Serrat,R., Bellocchio,L., Soria-Gomez,E., Busquets-Garcia,A., Pagano  
892 Zottola,A.C., Delamarre,A., Cannich,A., Vincent,P., Varilh,M., Robin,L.M., Terral,G., Garcia-  
893 Fernandez,M.D., Colavita,M., Mazier,W., Drago,F., Puente,N., Reguero,L., Elezgarai,I., Dupuy,J.W.,  
894 Cota,D., Lopez-Rodriguez,M.L., Barreda-Gomez,G., Massa,F., Grandes,P., Benard,G., and Marsicano,G.  
895 (2016). A cannabinoid link between mitochondria and memory. *Nature* *539*, 555-559.
- 896 Hefft,S., and Jonas,P. (2005). Asynchronous GABA release generates long-lasting inhibition at a  
897 hippocampal interneuron-principal neuron synapse. *Nat. Neurosci.* *8*, 1319-1328.
- 898 Heifets,B.D., Chevaleyre,V., and Castillo,P.E. (2008). Interneuron activity controls endocannabinoid-  
899 mediated presynaptic plasticity through calcineurin. *Proc. Natl. Acad. Sci. U. S. A* *105*, 10250-10255.
- 900 Isaacson,J.S., and Scanziani,M. (2011). How inhibition shapes cortical activity. *Neuron* *72*, 231-243.
- 901 Jiang,B., Huang,S., de,P.R., Millman,D., Song,L., Lee,H.K., Tsumoto,T., and Kirkwood,A. (2010). The  
902 maturation of GABAergic transmission in visual cortex requires endocannabinoid-mediated LTD of  
903 inhibitory inputs during a critical period. *Neuron* *66*, 248-259.

- 904 Jiang,X., Shen,S., Cadwell,C.R., Berens,P., Sinz,F., Ecker,A.S., Patel,S., and Tolias,A.S. (2015). Principles  
905 of connectivity among morphologically defined cell types in adult neocortex. *Science* 350, aac9462.
- 906 Jin,M., and Glickfeld,L.L. (2020). Mouse Higher Visual Areas Provide Both Distributed and Specialized  
907 Contributions to Visually Guided Behaviors. *Curr. Biol.* 30, 4682-4692.
- 908 Kano,M., Ohno-Shosaku,T., Hashimotodani,Y., Uchigashima,M., and Watanabe,M. (2009).  
909 Endocannabinoid-mediated control of synaptic transmission. *Physiol Rev.* 89, 309-380.
- 910 Katona,I., Sperlagh,B., Sik,A., Kafalvi,A., Vizi,E.S., Mackie,K., and Freund,T.F. (1999). Presynaptically  
911 located CB1 cannabinoid receptors regulate GABA release from axon terminals of specific  
912 hippocampal interneurons. *J. Neurosci.* 19, 4544-4558.
- 913 Katona,I., Urban,G.M., Wallace,M., Ledent,C., Jung,K.M., Piomelli,D., Mackie,K., and Freund,T.F.  
914 (2006). Molecular composition of the endocannabinoid system at glutamatergic synapses. *J. Neurosci.*  
915 26, 5628-5637.
- 916 Keller,A.J., Roth,M.M., and Scanziani,M. (2020). Feedback generates a second receptive field in  
917 neurons of the visual cortex. *Nature* 582, 545-549.
- 918 Kepecs,A., and Fishell,G. (2014). Interneuron cell types are fit to function. *Nature* 505, 318-326.
- 919 Kim,J., and Alger,B.E. (2001). Random response fluctuations lead to spurious paired-pulse facilitation.  
920 *J. Neurosci.* 21, 9608-9618.
- 921 Koukoulis,F., Rooy,M., Tziotis,D., Sailor,K.A., O'Neill,H.C., Levenga,J., Witte,M., Nilges,M.,  
922 Changeux,J.P., Hoeffler,C.A., Stitzel,J.A., Gutkin,B.S., Digregorio,D.A., and Maskos,U. (2017). Nicotine  
923 reverses hypofrontality in animal models of addiction and schizophrenia. *Nat. Med.*
- 924 Ladarre,D., Roland,A.B., Biedzinski,S., Ricobaraza,A., and Lenkei,Z. (2014). Polarized cellular patterns  
925 of endocannabinoid production and detection shape cannabinoid signaling in neurons. *Front Cell*  
926 *Neurosci.* 8, 426.
- 927 Larkum,M. (2013). A cellular mechanism for cortical associations: an organizing principle for the  
928 cerebral cortex. *Trends Neurosci.* 36, 141-151.
- 929 Lee,S.H., Foldy,C., and Soltesz,I. (2010). Distinct endocannabinoid control of GABA release at  
930 perisomatic and dendritic synapses in the hippocampus. *J. Neurosci.* 30, 7993-8000.
- 931 Lee,S.H., Kwan,A.C., Zhang,S., Phoumthipphavong,V., Flannery,J.G., Masmanidis,S.C., Taniguchi,H.,  
932 Huang,Z.J., Zhang,F., Boyden,E.S., Deisseroth,K., and Dan,Y. (2012). Activation of specific interneurons  
933 improves V1 feature selectivity and visual perception. *Nature* 488, 379-383.
- 934 Letierrier,C., Bonnard,D., Carrel,D., Rossier,J., and Lenkei,Z. (2004). Constitutive endocytic cycle of the  
935 CB1 cannabinoid receptor. *J. Biol. Chem.* 279, 36013-36021.
- 936 Losonczy,A., Biro,A.A., and Nusser,Z. (2004). Persistently active cannabinoid receptors mute a  
937 subpopulation of hippocampal interneurons. *Proc. Natl. Acad. Sci. U. S. A* 101, 1362-1367.
- 938 Lourenco,J., Cannich,A., Carta,M., Coussen,F., Mulle,C., and Marsicano,G. (2010). Synaptic activation  
939 of kainate receptors gates presynaptic CB(1) signaling at GABAergic synapses. *Nat. Neurosci.* 13, 197-  
940 204.

- 941 Lourenco,J., De Stasi,A.M., Deleuze,C., Bigot,M., Pazienti,A., Aguirre,A., Giugliano,M., Ostojic,S., and  
942 Bacci,A. (2020a). Modulation of Coordinated Activity across Cortical Layers by Plasticity of Inhibitory  
943 Synapses. *Cell Rep.* 30, 630-641.
- 944 Lourenco,J., Koukouli,F., and Bacci,A. (2020b). Synaptic inhibition in the neocortex: Orchestration and  
945 computation through canonical circuits and variations on the theme. *Cortex* 132, 258-280.
- 946 Lourenco,J., Pacioni,S., Rebola,N., van Woerden,G.M., Marinelli,S., DiGregorio,D., and Bacci,A. (2014).  
947 Non-associative Potentiation of Perisomatic Inhibition Alters the Temporal Coding of Neocortical Layer  
948 5 Pyramidal Neurons. *PLoS. Biol.* 12, e1001903.
- 949 Maejima,T., Hashimoto,K., Yoshida,T., Aiba,A., and Kano,M. (2001). Presynaptic inhibition caused by  
950 retrograde signal from metabotropic glutamate to cannabinoid receptors. *Neuron* 31, 463-475.
- 951 Manseau,F., Marinelli,S., Mendez,P., Schwaller,B., Prince,D.A., Huguenard,J.R., and Bacci,A. (2010).  
952 Desynchronization of Neocortical Networks by Asynchronous Release of GABA at Autaptic and  
953 Synaptic Contacts from Fast-Spiking Interneurons. *PLoS. Biol.* 8.
- 954 Marinelli,S., Pacioni,S., Cannich,A., Marsicano,G., and Bacci,A. (2009). Self-modulation of neocortical  
955 pyramidal neurons by endocannabinoids. *Nat. Neurosci.* 12, 1488-1490.
- 956 Markram,H., Toledo-Rodriguez,M., Wang,Y., Gupta,A., Silberberg,G., and Wu,C. (2004). Interneurons  
957 of the neocortical inhibitory system. *Nat. Rev. Neurosci* 5, 793-807.
- 958 Marsicano,G., and Lutz,B. (1999). Expression of the cannabinoid receptor CB1 in distinct neuronal  
959 subpopulations in the adult mouse forebrain. *Eur. J. Neurosci.* 11, 4213-4225.
- 960 Marsicano,G., Wotjak,C.T., Azad,S.C., Bisogno,T., Rammes,G., Cascio,M.G., Hermann,H., Tang,J.,  
961 Hofmann,C., Zieglgansberger,W., Di,M., V, and Lutz,B. (2002). The endogenous cannabinoid system  
962 controls extinction of aversive memories. *Nature* 418, 530-534.
- 963 Minderer,M., Brown,K.D., and Harvey,C.D. (2019). The Spatial Structure of Neural Encoding in Mouse  
964 Posterior Cortex during Navigation. *Neuron* 102, 232-248.
- 965 Murgas,K.A., Wilson,A.M., Michael,V., and Glickfeld,L.L. (2020). Unique Spatial Integration in Mouse  
966 Primary Visual Cortex and Higher Visual Areas. *J. Neurosci.* 40, 1862-1873.
- 967 Naka,A., Veit,J., Shababo,B., Chance,R.K., Risso,D., Stafford,D., Snyder,B., Egladyous,A., Chu,D.,  
968 Sridharan,S., Mossing,D.P., Paninski,L., Ngai,J., and Adesnik,H. (2019). Complementary networks of  
969 cortical somatostatin interneurons enforce layer specific control. *Elife.* 8.
- 970 Neu,A., Foldy,C., and Soltesz,I. (2007). Postsynaptic origin of CB1-dependent tonic inhibition of GABA  
971 release at cholecystinin-positive basket cell to pyramidal cell synapses in the CA1 region of the rat  
972 hippocampus. *J. Physiol* 578, 233-247.
- 973 Oliveira da Cruz,J.F., Busquets-Garcia,A., Zhao,Z., Varilh,M., Lavanco,G., Bellocchio,L., Robin,L.,  
974 Cannich,A., Julio-Kalajzi,F., LestÃ©-Lasserre,T., MaÃ®tre,M., Drago,F., Marsicano,G., and Soria-  
975 GÃ³mez,E. (2020). Specific Hippocampal Interneurons Shape Consolidation of Recognition Memory.  
976 *Cell Rep.* 32, 108046.
- 977 Paul,A., Crow,M., Raudales,R., He,M., Gillis,J., and Huang,Z.J. (2017). Transcriptional Architecture of  
978 Synaptic Communication Delineates GABAergic Neuron Identity. *Cell* 171, 522-539.

- 979 Petersen,C.C., and Crochet,S. (2013). Synaptic computation and sensory processing in neocortical  
980 layer 2/3. *Neuron* 78, 28-48.
- 981 Pfeffer,C.K., Xue,M., He,M., Huang,Z.J., and Scanziani,M. (2013). Inhibition of inhibition in visual  
982 cortex: the logic of connections between molecularly distinct interneurons. *Nat. Neurosci.* 16, 1068-  
983 1076.
- 984 Pluta,S.R., Telian,G.I., Naka,A., and Adesnik,H. (2019). Superficial layers suppress the deep layers to  
985 fine tune cortical coding. *J. Neurosci.*
- 986 Pouille,F., and Scanziani,M. (2001). Enforcement of temporal fidelity in pyramidal cells by somatic  
987 feed-forward inhibition. *Science* 293, 1159-1163.
- 988 Romano,S.A., PÃ©rez-Schuster,V., Jouary,A., Boulanger-Weill,J., Candeo,A., Pietri,T., and Sumbre,G.  
989 (2017). An integrated calcium imaging processing toolbox for the analysis of neuronal population  
990 dynamics. *PLoS. Comput. Biol.* 13, e1005526.
- 991 Rovira-Esteban,L., PÃ©terfi,Z., VikÃ¡r,A., MÃ¡tÃ©,Z., SzabÃ³,G., and HÃ¡jos,N. (2017). Morphological  
992 and physiological properties of CCK/CB1R-expressing interneurons in the basal amygdala. *Brain Struct.*  
993 *Funct.* 222, 3543-3565.
- 994 Saravia,R., Flores,Ã., Plaza-Zabala,A., Busquets-Garcia,A., Pastor,A., de la Torre,R., Di,M., V,  
995 Marsicano,G., Ozaita,A., Maldonado,R., and Berrendero,F. (2017). CB(1) Cannabinoid Receptors  
996 Mediate Cognitive Deficits and Structural Plasticity Changes During Nicotine Withdrawal. *Biol.*  
997 *Psychiatry* 81, 625-634.
- 998 Siegle,J.H., Jia,X., Durand,S., Gale,S., Bennett,C., Graddis,N., Heller,G., Ramirez,T.K., Choi,H.,  
999 Luviano,J.A., Groblewski,P.A., Ahmed,R., Arkhipov,A., Bernard,A., Billeh,Y.N., Brown,D., Buice,M.A.,  
1000 Cain,N., Caldejon,S., Casal,L., Cho,A., Chvilicek,M., Cox,T.C., Dai,K., Denman,D.J., de Vries,S.E.J.,  
1001 Dietzman,R., Esposito,L., Farrell,C., Feng,D., Galbraith,J., Garrett,M., Gelfand,E.C., Hancock,N.,  
1002 Harris,J.A., Howard,R., Hu,B., Hytten,R., Iyer,R., Jessett,E., Johnson,K., Kato,I., Kiggins,J., Lambert,S.,  
1003 Lecoq,J., Ledochowitsch,P., Lee,J.H., Leon,A., Li,Y., Liang,E., Long,F., Mace,K., Melchior,J., Millman,D.,  
1004 Mollenkopf,T., Nayan,C., Ng,L., Ngo,K., Nguyen,T., Nicovich,P.R., North,K., Ocker,G.K., Ollerenshaw,D.,  
1005 Oliver,M., Pachitariu,M., Perkins,J., Reding,M., Reid,D., Robertson,M., Ronellenfitch,K., Seid,S.,  
1006 Slaughterbeck,C., Stoecklin,M., Sullivan,D., Sutton,B., Swapp,J., Thompson,C., Turner,K.,  
1007 Wakeman,W., Whitesell,J.D., Williams,D., Williford,A., Young,R., Zeng,H., Naylor,S., Phillips,J.W.,  
1008 Reid,R.C., Mihalas,S., Olsen,S.R., and Koch,C. (2021). Survey of spiking in the mouse visual system  
1009 reveals functional hierarchy. *Nature* 592, 86-92.
- 1010 Siegle,J.H., Pritchett,D.L., and Moore,C.I. (2014). Gamma-range synchronization of fast-spiking  
1011 interneurons can enhance detection of tactile stimuli. *Nat. Neurosci.* 17, 1371-1379.
- 1012 Soria-Gomez,E., Bellocchio,L., Reguero,L., Lepousez,G., Martin,C., Bendahmane,M., Ruehle,S.,  
1013 Remmers,F., Desprez,T., Matias,I., Wiesner,T., Cannich,A., Nissant,A., Wadleigh,A., Pape,H.C.,  
1014 Chiarlone,A.P., Quarta,C., Verrier,D., Vincent,P., Massa,F., Lutz,B., Guzman,M., Gurden,H., Ferreira,G.,  
1015 Lledo,P.M., Grandes,P., and Marsicano,G. (2014). The endocannabinoid system controls food intake  
1016 via olfactory processes. *Nat. Neurosci.* 17, 407-415.
- 1017 Soria-Gomez,E., Busquets-Garcia,A., Hu,F., Mehidi,A., Cannich,A., Roux,L., Louit,I., Alonso,L.,  
1018 Wiesner,T., Georges,F., Verrier,D., Vincent,P., Ferreira,G., Luo,M., and Marsicano,G. (2015). Habenular  
1019 CB1 Receptors Control the Expression of Aversive Memories. *Neuron* 88, 306-313.

- 1020 Stringer,C., and Pachitariu,M. (2019). Computational processing of neural recordings from calcium  
1021 imaging data. *Curr. Opin. Neurobiol.* *55*, 22-31.
- 1022 Taniguchi,H., He,M., Wu,P., Kim,S., Paik,R., Sugino,K., Kvitsani,D., Fu,Y., Lu,J., Lin,Y., Miyoshi,G.,  
1023 Shima,Y., Fishell,G., Nelson,S.B., and Huang,Z.J. (2011). A resource of Cre driver lines for genetic  
1024 targeting of GABAergic neurons in cerebral cortex. *Neuron* *71*, 995-1013.
- 1025 Tremblay,R., Lee,S., and Rudy,B. (2016). GABAergic Interneurons in the Neocortex: From Cellular  
1026 Properties to Circuits. *Neuron* *91*, 260-292.
- 1027 Vogel,E., Krabbe,S., Gr ndemann,J., Wamsteeker Cusulin,J.I., and L thi,A. (2016). Projection-  
1028 Specific Dynamic Regulation of Inhibition in Amygdala Micro-Circuits. *Neuron* *91*, 644-651.
- 1029 Wamsteeker Cusulin,J.I., Senst,L., Teskey,G.C., and Bains,J.S. (2014). Experience salience gates  
1030 endocannabinoid signaling at hypothalamic synapses. *J. Neurosci.* *34*, 6177-6181.
- 1031 Whissell,P.D., Cajanding,J.D., Fogel,N., and Kim,J.C. (2015). Comparative density of CCK- and PV-GABA  
1032 cells within the cortex and hippocampus. *Front Neuroanat.* *9*, 124.
- 1033 Wilson,N.R., Runyan,C.A., Wang,F.L., and Sur,M. (2012). Division and subtraction by distinct cortical  
1034 inhibitory networks in vivo. *Nature* *488*, 343-348.
- 1035 Wilson,R.I., Kunos,G., and Nicoll,R.A. (2001). Presynaptic specificity of endocannabinoid signaling in  
1036 the hippocampus. *Neuron* *31*, 453-462.
- 1037 Wilson,R.I., and Nicoll,R.A. (2001). Endogenous cannabinoids mediate retrograde signalling at  
1038 hippocampal synapses. *Nature* *410*, 588-592.
- 1039 Winters,B.D., Kruger,J.M., Huang,X., Gallaher,Z.R., Ishikawa,M., Czaja,K., Krueger,J.M., Huang,Y.H.,  
1040 Schluter,O.M., and Dong,Y. (2012). Cannabinoid receptor 1-expressing neurons in the nucleus  
1041 accumbens. *Proc. Natl. Acad. Sci. U. S. A* *109*, E2717-E2725.
- 1042 Yoneda,T., Kameyama,K., Esumi,K., Daimyo,Y., Watanabe,M., and Hata,Y. (2013). Developmental and  
1043 visual input-dependent regulation of the CB1 cannabinoid receptor in the mouse visual cortex. *PLoS.*  
1044 *One.* *8*, e53082.
- 1045 Younts,T.J., and Castillo,P.E. (2014). Endogenous cannabinoid signaling at inhibitory interneurons.  
1046 *Curr. Opin. Neurobiol.* *26*, 42-50.
- 1047 Zhu,P.J., and Lovinger,D.M. (2007). Persistent synaptic activity produces long-lasting enhancement of  
1048 endocannabinoid modulation and alters long-term synaptic plasticity. *J. Neurophysiol.* *97*, 4386-4389.  
1049  
1050
- 1051

1052 **Figure Legends**

1053 **Figure 1. Differential CB1 expression and morphological properties of CB1 interneurons in primary**  
1054 **and secondary visual cortex**

1055 **A:** Left: Micrograph illustrating CB1 immunofluorescence in a coronal slice of a mouse brain including  
1056 V1 and V2M (delimited by dashed lines). Scale: 500  $\mu\text{m}$ . Right: Blowout and side-by-side comparison  
1057 of CB1 immunofluorescence between V1 and V2M of the same slice, using the identical acquisition  
1058 settings. Scale: 50  $\mu\text{m}$ . **B:** CB1 fluorescence intensity measured from pia to white matter in V1 and  
1059 V2M, normalized to the peak of fluorescence in both region. Layers are delimited by white/grey boxes,  
1060 with numbers in top left corners. **C:** Data from B binned into cortical layer. Error bars are SEM.  
1061 **\*\*** $p < 0.01$  and **\*\*\*\*** $p < 0.0001$ ;  $n = 3$  slices per animal,  $N = 11$  animals. **D:** Representative reconstructed  
1062 CB1 BCs in V1 (left) and V2M (right). Red and blue tracing refer to axons and dendrites, respectively.  
1063 Scale bar: 100  $\mu\text{m}$ . **E:** Heat map of CB1 BC axonal density in V1 (left) and V2M (right). Numbers  
1064 designate cortical layers. All filled neurons ( $n = 7$ , both areas) were overlapped to generate this figure.  
1065 **F:** Relative axonal (top) and dendritic (bottom) density, normalized by layer thickness (see methods).  
1066 **\*** $p < 0.05$  and **\*\*** $p < 0.01$ . **G:** Total axonal (top) and dendritic (bottom) length in the two areas.

1067

1068 **Figure 2. Functional differences of intra- and infra-layer connectivity of CB1 BCs in V1 and V2M**

1069 **A:** Connectivity rates of CB1 BC  $\rightarrow$  PN connectivity within L2/3 and to L4 in both V1 and V2M. **B:**  
1070 Representative voltage-clamp traces of evoked uIPSCs in the postsynaptic PN (presynaptic action  
1071 current above, in black) in monosynaptically connected pairs in V1 L2/3 (avg. in black), V2M L2/3 (avg.  
1072 in red) and V2M L4 (avg. in blue) principal neurons. Individual (30) sweeps in light grey. **C:** Population  
1073 data of uIPSC amplitude, failure rate, coefficient of variation (CV) and paired-pulse ratio (PPR). Black  
1074 circles: V1 L2/3 connections; red circles: V2 L2/3 connections; blue circles: V2 L4 connections. All bar  
1075 graphs represent mean  $\pm$  SEM; **\*** $p < 0.05$ , **\*\*\*\*** $p < 0.0001$ .

1076

1077 **Figure 3. Activity-dependent modulation of synaptic efficacy from CB1 BCs is visual area- and layer-**  
1078 **specific.**

1079 **A:** Representative traces illustrating uIPSCs recorded in PNs, in response to four trains of presynaptic  
1080 APs (10 spikes, 50 Hz) from CB1 BCs in V1, L2/3 (black), V2M, L2/3 (red) and V2M, L4 (blue). Shown  
1081 are averaged traces of at least 10 individual trials. **B:** Population data of total postsynaptic charge  
1082 calculated in the first and fourth train. **C:** Population data of percentage change of total postsynaptic  
1083 charge at the three synapses in the two visual areas. Color code of B-C as in A.

1084

1085 **Figure 4. Visual area- and layer-specific GABAergic synaptic strength from CB1 BCs is due to selective**  
1086 **tonic endocannabinoid signaling.**

1087 **A:** Representative uIPSC traces in the absence (Ctrl, left) and presence of 3  $\mu$ M AM-251 (right) in L2/3  
1088 of V1 (top, black), L2/3 of V2M (middle, red) and L4 of V2M (bottom, blue). Presynaptic spikes above  
1089 uIPSCs in black. Grey traces are individual sweeps. **B:** Population data of uIPSC amplitude (top), failure  
1090 rate and CV (bottom) recorded at the three synapses in control (open symbols) and in the presence of  
1091 AM-251 (filled symbols). Color code as in A. **C:** Schematic summary of the main finding of this study.  
1092 Grey area represents the specific expression of tonic CB1 signaling conferring weaker inhibition from  
1093 CB1 BCs onto PNs in L2/3 of V2M.

1094

1095 **Figure 5. Spontaneous activity of PNs is higher in V2M as compared to V1.**

1096 **A:** Schematic of 2P imaging recordings in awake mice free to locomote on a rotating disk. **B:**  
1097 Representative, average intensity projection images obtained in L2/3 of V1 from a CB1-tdTomato  
1098 mouse. Red indicates tdTomato expression (left), green shows GCaMP6f expression (middle). The right  
1099 panel illustrates the overlay of the red and green channels. Arrowheads point to CB1-expressing  
1100 neurons. Scale bar: 50  $\mu$ m. **C:** Representative 2P  $\text{Ca}^{2+}$  fluorescence traces from three PNs in V1 (black,  
1101 left) and in V2M (red, right). **D:** Population histogram of the mean  $\Delta F/F_0$  in V1 (white column) and V2M



1102 (red column). Each dot represents an individual mouse. **E-F:** Same as in C-D but on tdTomato  
1103 expressing interneurons.

1104

1105 **Figure 6. Visual area-specific tonic CB1 signaling underlies higher activity in V2M than V1.**

1106 **A, Top:** Representative 2P Ca<sup>2+</sup> fluorescence traces from two PNs in V1 (black, left) and in V2M (red,  
1107 right) in two control mice (one for each visual area), injected with vehicle solution. **A, Bottom:**  
1108 Representative 2P Ca<sup>2+</sup> fluorescence traces from two PNs in V1 (gray, left) and in V2M (brown, right)  
1109 two mice (one for each visual area), injected with the CB1 antagonist Rimonabant. **B:** Population  
1110 histogram of the mean  $\Delta F/F_0$  in V1 (white columns) and V2M (red columns) for vehicle- and  
1111 Rimonabant-injected mice. Each grey dot represents an individual mouse. All mice were CB1-  
1112 tdTomato mice, except the one represented by a darker dot, which refers to a CB1<sup>fl/fl</sup> mouse. **C:**  
1113 Schematic of the local genetic CB1 deletion in the two visual areas. Adult CB1<sup>fl/fl</sup> mice were  
1114 stereotaxically injected in either V1 or V2M with AAV-*Cre* or control (AAV-tdTomato) vectors. **D:**  
1115 Representative 2P Ca<sup>2+</sup> fluorescence traces from two PNs in V1 injected with the control AAV (V1-CB1-  
1116 WT, top) and AAV-*Cre* (V1-CB1-KO) vectors (bottom). **E:** Same as in D, but for two mice injected in  
1117 V2M. **F:** Population graph illustrating the mean  $\Delta F/F_0$  in V1 (white columns) and V2M (red columns)  
1118 for mice (black dots) injected with control or *Cre* vectors.

1119

1120 **Figure 7. Modulation of perisomatic inhibition from CB1 BCs affects correlated activity of PNs**  
1121 **selectively in V2M.**

1122 **A:** Pairwise correlation matrices of two representative time series in V1 (left) and V2M (right) from  
1123 CB1-tdTomato mice. The heatmaps indicate low (blue), intermediate (green) and high (yellow) levels  
1124 of correlated activity. **B:** Population data of the spike time tiling coefficient (STTC) in V1 (black) and  
1125 V2M (red). STTC is a coefficient quantifying the degree of correlated activity of 2P Ca<sup>2+</sup> imaging  
1126 neurons. Each dot is a time-series. **C-F:** Same as in A-B but for CB1<sup>fl/fl</sup> mice injected with control AAV  
1127 (CB1-WT) and AAV-*Cre* (CB1-KO) vectors in V1 (C-D) and V2M (E-F). Color code for different viral  
1128 vectors and visual areas in D and F as in Fig. 6 D-E.

1129

1130 **Figure S1. Density of CB1-expressing interneurons in V1 and V2M.**

1131 **A:** Top row: Micrograph illustrating tdTomato (red) and EGFP (green) immunoreactivity in V1 and V2M  
1132 in a CB1-tdTomato::GAD67EGFP mouse. This line was used to quantify CB1-expressing interneurons  
1133 in L2/3 of the two visual areas. White dashed boxes are illustrated at increased resolution in the two  
1134 rows below. Orange arrows illustrate CB1-expressing interneurons and red arrows illustrate CB1-  
1135 expressing principal (pyramidal?) neurons. Scale bar: 100 (top row) and 25  $\mu\text{m}$  (middle and bottom  
1136 rows). **B:** Pie charts illustrating the fraction of CB1-expressing interneurons (co-localizing with EGFP)  
1137 in the two visual areas. **C:** Cortical laminar density of CB1 INs in L2/3 of V1 and V2. Mean  $\pm$  SEM, n=3  
1138 slices/animal, N = 5 animals for each condition. \*:  $P < 0.05$ .

1139

1140 **Figure S2. Lack of expression of PV and SST markers in CB1 BCs of the mouse visual cortex**

1141 **A:** Micrograph illustrating DsRed (red) and GFP (green) immunoreactivity against tdTomato and  
1142 parvalbumin, respectively, in V1 and V2M. Note the lack of co-localization of parvalbumin marker with  
1143 tdTomato CB1 BCs. **B:** Micrograph illustrating DsRed (red) and GFP (green) immunoreactivity against  
1144 tdTomato and somatostatin, respectively, in V1 and V2M. Note the lack of co-localization of  
1145 somatostatin marker with tdTomato CB1 BCs. **C:** Micrograph illustrating DsRed (red) and GFP (green)  
1146 immunoreactivity in a 5-HT3-Cre::RCE mouse crossed with a CB1-tdTomato mouse. Therefore, GFP  
1147 expression labels 5-HT3-expressing interneurons. Note extensive co-localization between the two  
1148 markers. **D:** Summary plot of CB1/5-Ht3aR co-localization in V1 and V2M. **E:** Representative  
1149 micrograph illustrating fluorescent *in situ* hybridization (FISH) against *Cnr1* (CB1) mRNA (green) and  
1150 immunohistochemistry for DsRed in a CB1-tdTomato mouse to label td-Tomato-expressing neurons.  
1151 **F:** Same as in E, but FISH was performed using anti-*Cck* probes. **G:** Summary graphs illustrating co-  
1152 localization of *Cnr1* (CB1, left) and *Cck* (right) mRNA and td-Tomato. Please note the massive co-  
1153 localization of CB1 mRNA with td-Tomato, validating the mouse line. Note also the extensive co-

1154 localization with CCK. For PV, n=3 slices/animal, N = 3 animals; for SST, = 4 slices/animals, N = 3  
1155 animals. For *Cnr1* n=4 slices/animal, N = 5 animals, for *Cck* n=6 slices/animal, N = 6 animals

1156

1157 **Figure S3. L4 of V2M is highly innervated by L2/3 CB1 BCs axons.**

1158 **A:** Individual reconstructions of CB1 BCs in V1 filled with biocytin (5-8 mg/mL). Dendrites are in blue,  
1159 axons in red, and soma in turquoise. **B:** Same as in A but for CB1 BCs in V2. Scale bars = 100  $\mu$ m.

1160

1161 **Figure S4. L2/3 CB1 INs exhibit similar active and passive single-cell properties in V1 and V2.**

1162 **A:** Phase plane plots of the derivative of a single AP (insert) evoked by minimal current injection step  
1163 (1.5 ms) in V1 (black) and V2 (red). **B-E:** Action potential parameters analyzed for characterization of  
1164 the two CB1 BCs populations. **F:** Injection of negative and positive current in V1 (black trace) and V2  
1165 (red trace), with the resulting frequency/injected current curve (right). **G:** Coefficient of variation of  
1166 the inter-spike interval of spikes elicited by depolarizing pulses. **H:** Adaptation coefficient  
1167 corresponding to the ratio of the interval between the two first and two last spikes elicited by a  
1168 depolarizing pulse.

1169 **Figure S5. L2/3 CB1 INs from V1 and V2 exhibit perisomatic properties**

1170 **A:** Representative uIPSC traces illustrating fast rise time from L2/3 of V1 (black), L 2/3 of V2M (red)  
1171 and L4 of V2M (blue). **B:** Population data the three synaptic connections displaying fast (<1ms) rise  
1172 times. **C:** Micrograph illustrating DsRed (red) and GFP (green) immunoreactivity against tdTomato and  
1173 GAD67, respectively, in V1 and V2M. Note the perisomatic pattern of innervation, typical of basket  
1174 cells. Scale bars = 10  $\mu$ m. Images were acquired with an inverted Confocal SP8 Leica DSL microscope.

1175

1176 **Figure S6. CB1-dependent DSI was robustly present in all three synapses**

1177 **A:** Representative traces in V1 L2/3 (top, black) V2 L2/3 (middle, red) and V2 L4 (bottom, blue) during  
1178 the baseline (left), DSI (middle) and recovery from DSI (right). In all cases, presynaptic spikes above  
1179 uIPSCs (black). Individual traces in grey and averages in the corresponding colour. Three sweeps were

1180 averaged for DSI and ten for baseline and recovery. Due to variability in uIPSC amplitude and high  
1181 percentage of failures especially in V2M L4, the amplitude of postsynaptic responses to the  
1182 presynaptic spike train was averaged in across the train (Vogel et al., 2016). B: Left panel, time course  
1183 of average uIPSCs during baseline, DSI and recovery periods DSI in the three connections. The black  
1184 dotted line represents the baseline value of 100 %. Right panel, time course of average uIPSCs during  
1185 baseline, DSI and recovery periods DSI in presence of AM-251 for the three connections. C: Plot of  
1186 individual average uIPSC amplitude after DSI. There is no differences in the maximum DSI values  
1187 between connections in V1 L2/3, V2 L2/3 or V2 L4.

1188

1189 **Figure S7. Quantification of CB1 expression after local AAV-Cre injection in CB1<sup>flxed/flxed</sup> mice.**

1190 **A:** Representative micrograph illustrating CB1 immunofluorescence in V1 of a CB1<sup>flxed/flxed</sup> mouse  
1191 injected with AAV-cre viral particles (ipsilateral, left) and its contralateral, non-injected site (right). Site  
1192 of injection was identified by co-injection of AAV-tdTomato virus. CB1 pattern of expression was  
1193 obtained using the “straight’ imageJ-option with a line width of 49  $\mu\text{m}$ . **B:** Summary graph of CB1  
1194 immunofluorescence in AAV-control and AAV-Cre injected mice.

1195

1196
